# Supplementary material
Source: PubMed Central journal article supplement (PMC7440798)
Supplement: AEM.00891-20-s0001.pdf [file AEM.00891-20-s0001.pdf]

## Supplemental material

### The biocontrol agent and insect pathogen *Photorhabdus luminescens* interacts with plant roots

Alice Regaiolo<sup>1,\*</sup>, Nazzareno Dominelli<sup>1,\*</sup>, Karsten Andresen, Ralf Heermann\*

<sup>1</sup>Johannes-Gutenberg-University Mainz, Institute of Molecular Physiology (imP), Microbiology and Wine Research, Johann-Joachim-Becher-Weg 13, 55128 Mainz, Germany

\* the authors contributed equally to the manuscript

\*corresponding author (heermann@uni-mainz.de)

Keywords: Entomopathogenic bacteria, entomopathogenic nematodes, bacteria-plant interaction, phenotypic heterogeneity

**Table S1:** List of Differentially Expressed Genes in *P. luminescens* 2° cells in the presence of pea root exudates obtained from RNAseq analysis.

| Gene Name           | log2 Fold Change | p value  | Function                                                      |
|---------------------|------------------|----------|---------------------------------------------------------------|
| <i>PluDJC_11885</i> | 6.87628          | 0.0206   | chitinase                                                     |
| <i>PluDJC_24115</i> | 6.3953           | 0.0021   | periplasmic heavy metal sensor                                |
| <i>PluDJC_23505</i> | 5.81879          | 5.00E-04 | bacterioferritin-associated ferredoxin                        |
| <i>PluDJC_12430</i> | 5.76817          | 0.00645  | DUF805 domain-containing protein                              |
| <i>PluDJC_15505</i> | 5.61564          | 0.0019   | DUF3277 family protein                                        |
| <i>PluDJC_12460</i> | 5.36275          | 0.0092   | chitin-binding protein                                        |
| <i>PluDJC_11345</i> | 5.31142          | 0.02365  | hypothetical protein                                          |
| <i>PluDJC_10990</i> | 5.2556           | 0.00385  | hypothetical protein                                          |
| <i>PluDJC_15690</i> | 5.25491          | 5.00E-05 | catalase                                                      |
| <i>PluDJC_03740</i> | 5.2489           | 0.01665  | membrane protein                                              |
| <i>PluDJC_03960</i> | 5.18849          | 0.00955  | XRE family transcriptional regulator. MrfJ Protein. repressor |
| <i>PluDJC_21620</i> | 5.17417          | 0.01265  | tail fiber assembly protein                                   |
| <i>PluDJC_10985</i> | 5.11816          | 5.00E-05 | inverse autotransporter beta-barrel domain-containing protein |
| <i>PluDJC_12425</i> | 5.09951          | 0.00045  | FAD-dependent oxidoreductase                                  |
| <i>PluDJC_13800</i> | 4.88762          | 0.0077   | hemin uptake protein HemP                                     |
| <i>PluDJC_12440</i> | 4.80771          | 5.00E-05 | polyketide cyclase                                            |
| <i>PluDJC_12435</i> | 4.71877          | 5.00E-05 | 4-aminobutyrate--2-oxoglutarate transaminase                  |
| <i>PluDJC_15515</i> | 4.64699          | 0.0119   | bacteriophage protein                                         |
| <i>PluDJC_15015</i> | 4.57809          | 0.00845  | hypothetical protein                                          |
| <i>PluDJC_15510</i> | 4.56877          | 5.00E-05 | DUF3383 domain-containing protein                             |
| <i>PluDJC_02160</i> | 4.47625          | 0.00015  | hypothetical protein                                          |
| <i>PluDJC_00675</i> | 4.47415          | 0.0188   | universal stress protein UspB                                 |
| <i>PluDJC_12445</i> | 4.35122          | 5.00E-05 | gamma-aminobutyraldehyde dehydrogenase                        |
| <i>PluDJC_00280</i> | 4.28976          | 0.02455  | D-ribose pyranase                                             |
| <i>PluDJC_13625</i> | 4.23568          | 0.0431   | DUF1289 domain-containing protein. oxidoreductase             |
| <i>PluDJC_07845</i> | 4.22692          | 0.00695  | cold shock-like protein CspD                                  |
| <i>PluDJC_11030</i> | 4.20947          | 5.00E-05 | stress response protein YchH                                  |
| <i>smpB</i>         | 4.02402          | 5.00E-05 | SsrA-binding protein. smpB                                    |
| <i>PluDJC_12275</i> | 4.01263          | 5.00E-05 | hypothetical protein. polyurethanase                          |
| <i>PluDJC_13620</i> | 4.00864          | 5.00E-05 | transcriptional regulator SlyA                                |
| <i>PluDJC_23060</i> | 3.96129          | 0.00825  | tRNA                                                          |
| <i>PluDJC_15445</i> | 3.80448          | 0.01645  | tail fiber assembly protein                                   |
| <i>PluDJC_05330</i> | 3.78353          | 5.00E-05 | single-stranded DNA-binding protein                           |
| <i>PluDJC_11440</i> | 3.76167          | 0.01685  | hypothetical protein                                          |
| <i>PluDJC_10375</i> | 3.60964          | 5.00E-05 | PRD domain-containing protein                                 |
| <i>PluDJC_05625</i> | 3.59259          | 0.01425  | PilT/PilU family type 4a pilus ATPase                         |
| <i>PluDJC_05655</i> | 3.58648          | 0.0442   | DsbA family protein                                           |
| <i>PluDJC_10370</i> | 3.56927          | 5.00E-05 | hypothetical protein                                          |
| <i>PluDJC_14550</i> | 3.45793          | 5.00E-05 | DUF1508 domain-containing protein                             |

|                     |         |          |                                                                                    |
|---------------------|---------|----------|------------------------------------------------------------------------------------|
| <i>PluDJC_06205</i> | 3.45331 | 5.00E-05 | transcription antiterminator/RNA stability regulator CspE                          |
| <i>PluDJC_05350</i> | 3.43194 | 0.0118   | hypothetical protein                                                               |
| <i>PluDJC_21720</i> | 3.35034 | 0.0036   | hypothetical protein. VImB like protein                                            |
| <i>PluDJC_10380</i> | 3.34207 | 5.00E-05 | YhfX family PLP-dependent enzyme                                                   |
| <i>PluDJC_22225</i> | 3.32812 | 1.00E-04 | ornithine carbamoyltransferase                                                     |
| <i>PluDJC_17480</i> | 3.32431 | 5.00E-05 | hypothetical protein                                                               |
| <i>PluDJC_14040</i> | 3.32314 | 0.00545  | metal ABC transporter permease                                                     |
| <i>PluDJC_14580</i> | 3.32114 | 5.00E-05 | class I fructose-bisphosphate aldolase                                             |
| <i>PluDJC_13845</i> | 3.29206 | 0.00045  | hypothetical protein                                                               |
| <i>PluDJC_03315</i> | 3.26786 | 5.00E-05 | matrixin family metalloprotease. serralyisin                                       |
| <i>PluDJC_23500</i> | 3.23158 | 5.00E-05 | bacterioferritin                                                                   |
| <i>PluDJC_21145</i> | 3.20286 | 5.00E-05 | APC family permease                                                                |
| <i>PluDJC_10255</i> | 3.20245 | 0.0021   | D-serine transporter DsdX                                                          |
| <i>PluDJC_22230</i> | 3.1211  | 0.02115  | hypothetical protein                                                               |
| <i>PluDJC_14950</i> | 3.10185 | 5.00E-05 | iron ABC transporter permease                                                      |
| <i>PluDJC_05520</i> | 3.09809 | 0.02425  | DUF3085 domain-containing protein                                                  |
| <i>PluDJC_02265</i> | 3.08015 | 0.001    | VRR-NUC domain-containing protein                                                  |
| <i>PluDJC_00270</i> | 3.05975 | 0.00105  | ATPase RavA stimulator ViaA                                                        |
| <i>PluDJC_21140</i> | 3.05353 | 0.0041   | DUF3156 family protein                                                             |
| <i>PluDJC_10865</i> | 3.03807 | 0.006    | tail assembly protein                                                              |
| <i>PluDJC_20090</i> | 2.99454 | 0.0268   | hypothetical protein                                                               |
| <i>PluDJC_12930</i> | 2.9624  | 5.00E-05 | cob(I)alamin adenosyltransferase                                                   |
| <i>PluDJC_03495</i> | 2.95802 | 0.0208   | Rho-binding antiterminator                                                         |
| <i>PluDJC_16740</i> | 2.94935 | 0.00155  | iron-sulfur cluster assembly protein IscA                                          |
| <i>PluDJC_19160</i> | 2.88271 | 0.00155  | transcriptional regulator BofA                                                     |
| <i>PluDJC_09110</i> | 2.84985 | 0.0227   | ribosome modulation factor                                                         |
| <i>PluDJC_06705</i> | 2.7834  | 0.0014   | hypothetical protein                                                               |
| <i>PluDJC_19815</i> | 2.72432 | 0.02195  | pirin family protein                                                               |
| <i>PluDJC_03822</i> | 2.71407 | 7.00E-04 | hypothetical protein                                                               |
| <i>PluDJC_10280</i> | 2.69455 | 0.00185  | type II toxin-antitoxin system RelE/ParE family toxin. addiction module toxin RelE |
| <i>PluDJC_21035</i> | 2.67326 | 0.0393   | DUF1435 family protein                                                             |
| <i>PluDJC_04230</i> | 2.65053 | 5.00E-05 | type VI secretion system tip protein VgrG                                          |
| <i>PluDJC_06425</i> | 2.64932 | 5.00E-05 | ferric iron uptake transcriptional regulator                                       |
| <i>PluDJC_16170</i> | 2.63146 | 5.00E-05 | TIGR01777 family protein                                                           |
| <i>PluDJC_24585</i> | 2.62299 | 0.0057   | formate dehydrogenase cytochrome b556 subunit                                      |
| <i>PluDJC_12480</i> | 2.56253 | 0.00105  | TIGR02293 family toxin-antitoxin system antitoxin component                        |
| <i>PluDJC_10855</i> | 2.54253 | 5.00E-05 | aquaporin Z                                                                        |
| <i>PluDJC_19360</i> | 2.52862 | 0.0021   | phosphate regulon transcriptional regulatory protein PhoB                          |
| <i>PluDJC_19615</i> | 2.48874 | 5.00E-05 | 3,4-dihydroxy-2-butanone-4-phosphate synthase                                      |
| <i>PluDJC_15335</i> | 2.45739 | 0.00325  | addiction module antidote protein. HigA family. XRE transcriptional regulator      |
| <i>PluDJC_07425</i> | 2.45194 | 0.0019   | molybdopterin synthase catalytic subunit MoaE                                      |
| <i>PluDJC_05975</i> | 2.42781 | 5.00E-05 | carbon storage regulator                                                           |

|                     |         |          |                                                                                           |
|---------------------|---------|----------|-------------------------------------------------------------------------------------------|
| <i>PluDJC_11960</i> | 2.42218 | 0.0059   | type II toxin-antitoxin system ParD family antitoxin                                      |
| <i>PluDJC_12890</i> | 2.40357 | 5.00E-05 | hypothetical protein                                                                      |
| <i>PluDJC_00425</i> | 2.36509 | 0.0049   | DUF2282 domain-containing protein                                                         |
| <i>PluDJC_13835</i> | 2.34191 | 0.00035  | helix-turn-helix domain-containing protein. AraC transcriptor regulator                   |
| <i>PluDJC_19790</i> | 2.34134 | 5.00E-05 | DUF883 domain-containing protein. membrane protein                                        |
| <i>PluDJC_02070</i> | 2.3336  | 0.0094   | protein SlyX                                                                              |
| <i>PluDJC_14480</i> | 2.30292 | 0.0363   | phosphoribosylglycinamide formyltransferase                                               |
| <i>PluDJC_13815</i> | 2.2889  | 0.00015  | hemin ABC transporter substrate-binding protein                                           |
| <i>PluDJC_10275</i> | 2.27857 | 0.02465  | hypothetical protein                                                                      |
| <i>PluDJC_06710</i> | 2.27206 | 0.00245  | peptidase M4 family protein                                                               |
| <i>PluDJC_06415</i> | 2.25413 | 0.00235  | type II toxin-antitoxin system YafQ family toxin                                          |
| <i>PluDJC_13505</i> | 2.25023 | 0.00025  | Zinc transport protein ZntB                                                               |
| <i>PluDJC_09560</i> | 2.24855 | 0.00085  | biofilm formation regulator BssS                                                          |
| <i>PluDJC_12215</i> | 2.24528 | 0.0035   | hypothetical protein. Arc family DNAbindprotein. toxic-antitoxic system HicB Nitrosomonas |
| <i>PluDJC_14210</i> | 2.23683 | 0.00075  | hypothetical protein                                                                      |
| <i>PluDJC_14215</i> | 2.20892 | 0.0032   | type II restriction endonuclease PaeR7I                                                   |
| <i>PluDJC_05660</i> | 2.20764 | 0.0077   | MBL fold metallo-hydrolase. beta lactamase                                                |
| <i>PluDJC_11000</i> | 2.20329 | 5.00E-05 | hypothetical protein                                                                      |
| <i>PluDJC_23725</i> | 2.20201 | 5.00E-05 | 1,4-dihydroxy-2-naphthoate polyprenyltransferase                                          |
| <i>PluDJC_22505</i> | 2.19933 | 0.00245  | putative DNA-binding transcriptional regulator                                            |
| <i>PluDJC_20235</i> | 2.1914  | 5.00E-05 | DNA-binding transcriptional regulator Fis                                                 |
| <i>PluDJC_10995</i> | 2.18196 | 2.00E-04 | hypothetical protein                                                                      |
| <i>PluDJC_12485</i> | 2.17299 | 0.0024   | RES domain-containing protein                                                             |
| <i>PluDJC_11445</i> | 2.16917 | 1.00E-04 | heat shock protein HslJ                                                                   |
| <i>PluDJC_06415</i> | 2.14987 | 0.0025   | type II toxin-antitoxin system RelB/DinJ family antitoxin. XRE transcription reg.         |
| <i>PluDJC_11575</i> | 2.14    | 0.04645  | type II toxin-antitoxin system RelE/ParE family toxin                                     |
| <i>PluDJC_07760</i> | 2.11571 | 0.0155   | hypothetical protein                                                                      |
| <i>PluDJC_01825</i> | 2.10368 | 5.00E-05 | Hcp family type VI secretion system effector                                              |
| <i>PluDJC_01280</i> | 2.08546 | 5.00E-05 | disulfide bond formation protein B                                                        |
| <i>PluDJC_12855</i> | 2.07901 | 0.0061   | alpha/beta hydrolase                                                                      |
| <i>PluDJC_08510</i> | 2.07629 | 5.00E-05 | Rpn family recombination-promoting nuclease/putative transposase                          |
| <i>PluDJC_17325</i> | 2.07437 | 5.00E-05 | autotransporter domain-containing esterase. lipase                                        |
| <i>PluDJC_09110</i> | 2.0739  | 0.0109   | acylphosphatase                                                                           |
| <i>PluDJC_11430</i> | 2.07134 | 5.00E-05 | YcgN family cysteine cluster protein                                                      |
| <i>PluDJC_16735</i> | 2.02714 | 5.00E-05 | co-chaperone HscB                                                                         |
| <i>PluDJC_12100</i> | 2.01634 | 0.0033   | cytotoxin                                                                                 |
| <i>PluDJC_21835</i> | 2.00046 | 0.01005  | transcription/translation regulatory transformer protein RfaH                             |
| <i>PluDJC_17215</i> | 1.98906 | 5.00E-05 | SsrA-binding protein SmpB                                                                 |
| <i>PluDJC_21205</i> | 1.98172 | 5.00E-05 | FAD-binding oxidoreductase                                                                |
| <i>PluDJC_12235</i> | 1.95376 | 0.01195  | type II toxin-antitoxin system RelE/ParE family toxin. plasmid stabilization              |

|                     |         |          |                                                                    |
|---------------------|---------|----------|--------------------------------------------------------------------|
| <i>PluDJC_16745</i> | 1.93679 | 5.00E-05 | Fe-S cluster assembly scaffold IscU                                |
| <i>PluDJC_14955</i> | 1.9312  | 5.00E-05 | iron ABC transporter substrate-binding protein                     |
| <i>PluDJC_05675</i> | 1.91638 | 5.00E-05 | diaminopimelate decarboxylase                                      |
| <i>PluDJC_20230</i> | 1.91563 | 5.00E-05 | tRNA dihydrouridine synthase DusB                                  |
| <i>PluDJC_15955</i> | 1.91108 | 5.00E-05 | hypothetical protein. RhS like core protein                        |
| <i>PluDJC_13400</i> | 1.91107 | 0.00235  | peptide-methionine (R)-S-oxide reductase                           |
| <i>PluDJC_20020</i> | 1.89217 | 5.00E-05 | ribosome hibernation promoting factor                              |
| <i>PluDJC_21845</i> | 1.87584 | 5.00E-05 | Sec-independent protein translocase subunit TatC                   |
| <i>PluDJC_17730</i> | 1.87298 | 5.00E-05 | oxidative stress defense protein                                   |
| <i>PluDJC_10820</i> | 1.85825 | 0.00075  | CDP-diacylglycerol--glycerol-3-phosphate 3-phosphatidyltransferase |
| <i>PluDJC_03675</i> | 1.85577 | 5.00E-05 | murein hydrolase activator NlpD. peptidase M23                     |
| <i>PluDJC_10165</i> | 1.84506 | 5.00E-05 | flagellar regulatory protein FlIZ                                  |
| <i>PluDJC_12565</i> | 1.83847 | 0.04995  | electron transport complex subunit RsxA                            |
| <i>PluDJC_14965</i> | 1.82471 | 0.0043   | LysR family transcriptional regulator                              |
| <i>PluDJC_13395</i> | 1.79979 | 0.00365  | DUF1315 family protein                                             |
| <i>PluDJC_20450</i> | 1.7985  | 5.00E-05 | Rpn family recombination-promoting nuclease/putative transposase   |
| <i>PluDJC_17205</i> | 1.79667 | 0.00985  | RnfH family protein                                                |
| <i>PluDJC_23730</i> | 1.79095 | 5.00E-05 | ribonuclease E activity regulator RraA                             |
| <i>PluDJC_22695</i> | 1.7892  | 1.00E-04 | HTH-type transcriptional repressor. nsrR                           |
| <i>PluDJC_14225</i> | 1.78843 | 5.00E-05 | modification methylase PaeR7I                                      |
| <i>PluDJC_18465</i> | 1.78439 | 5.00E-05 | aldehyde dehydrogenase family protein                              |
| <i>PluDJC_21200</i> | 1.77666 | 1.00E-04 | DUF861 domain-containing protein                                   |
| <i>PluDJC_23835</i> | 1.76404 | 0.02815  | type II toxin-antitoxin system RelE/ParE family toxin              |
| <i>PluDJC_15330</i> | 1.75186 | 0.0191   | hypothetical protein                                               |
| <i>PluDJC_21135</i> | 1.74492 | 0.01235  | hypothetical protein                                               |
| <i>PluDJC_14230</i> | 1.74194 | 5.00E-05 | glutamine-hydrolyzing GMP synthase                                 |
| <i>PluDJC_12355</i> | 1.73682 | 0.00845  | antitoxin                                                          |
| <i>PluDJC_03420</i> | 1.72425 | 3.00E-04 | Ribosome-recycling factor                                          |
| <i>PluDJC_13055</i> | 1.71168 | 0.00255  | acyl-CoA thioester hydrolase YciA                                  |
| <i>PluDJC_16275</i> | 1.70755 | 6.00E-04 | tripartite tricarboxylate transporter permease                     |
| <i>PluDJC_13055</i> | 1.70033 | 0.00155  | TonB system transport protein TonB                                 |
| <i>PluDJC_07415</i> | 1.69656 | 0.0028   | cyclic pyranopterin monophosphate synthase MoaC                    |
| <i>PluDJC_05175</i> | 1.68868 | 0.001    | hypothetical protein                                               |
| <i>PluDJC_22575</i> | 1.68068 | 0.0019   | YtfJ family protein                                                |
| <i>PluDJC_16000</i> | 1.67868 | 5.00E-05 | Rpn family recombination-promoting nuclease/putative transposase   |
| <i>PluDJC_20450</i> | 1.67621 | 0.00235  | LysR family transcriptional regulator                              |
| <i>PluDJC_10030</i> | 1.65666 | 0.0126   | XRE family transcriptional regulator. 2-hydroxyacid dehydrogenase  |
| <i>PluDJC_12230</i> | 1.64065 | 0.00335  | ribbon-helix-helix protein. CopG family                            |
| <i>PluDJC_07315</i> | 1.63698 | 0.0021   | pyridoxal phosphatase                                              |
| <i>PluDJC_22560</i> | 1.63545 | 0.0021   | peptide-methionine (S)-S-oxide reductase MsrA                      |

|                     |         |          |                                                                                  |
|---------------------|---------|----------|----------------------------------------------------------------------------------|
| <i>PluDJC_20270</i> | 1.62865 | 0.0055   | high-affinity branched-chain amino acid ABC transporter permease LivM            |
| <i>PluDJC_05975</i> | 1.60914 | 0.02175  | inner membrane protein YpjD                                                      |
| <i>PluDJC_18840</i> | 1.60126 | 5.00E-05 | Rpn family recombination-promoting nuclease/putative transposase                 |
| <i>PluDJC_01480</i> | 1.59558 | 5.00E-05 | hypothetical protein                                                             |
| <i>PluDJC_01370</i> | 1.59286 | 0.00445  | hypothetical protein                                                             |
| <i>PluDJC_00420</i> | 1.58851 | 0.01285  | DUF692 domain-containing protein                                                 |
| <i>PluDJC_14235</i> | 1.57953 | 5.00E-05 | IMP dehydrogenase                                                                |
| <i>PluDJC_16750</i> | 1.56049 | 1.00E-04 | IscS subfamily cysteine desulfurase                                              |
| <i>PluDJC_24585</i> | 1.53773 | 0.0027   | Ribonuclease P protein component. rpnA                                           |
| <i>PluDJC_17855</i> | 1.52983 | 0.0082   | beta-lactamase regulator AmpE                                                    |
| <i>PluDJC_03065</i> | 1.52406 | 0.0024   | co-chaperone DjIA                                                                |
| <i>PluDJC_13055</i> | 1.51748 | 0.02755  | DUF440 family protein. dsDNA-mimic protein                                       |
| <i>PluDJC_00265</i> | 1.47121 | 0.00405  | aspartate--ammonia ligase                                                        |
| <i>PluDJC_21130</i> | 1.46246 | 0.0283   | nucleotidyl transferase AbiEii/AbiGii toxin family protein                       |
| <i>PluDJC_21175</i> | 1.45249 | 0.00055  | DUF1795 domain-containing protein                                                |
| <i>PluDJC_19505</i> | 1.45004 | 0.00035  | ImmA/IrrE family metallo-endopeptidase                                           |
| <i>PluDJC_19015</i> | 1.44936 | 0.00195  | hypothetical protein                                                             |
| <i>PluDJC_24570</i> | 1.44852 | 0.00265  | sulfate ABC transporter substrate-binding protein                                |
| <i>PluDJC_03680</i> | 1.44391 | 5.00E-04 | RNA polymerase sigma factor RpoS                                                 |
| <i>PluDJC_01485</i> | 1.44165 | 0.00035  | hypothetical protein                                                             |
| <i>PluDJC_12355</i> | 1.42461 | 0.00245  | SDR family oxidoreductase. 3-ketoacyl-ACP reductase                              |
| <i>PluDJC_16730</i> | 1.42423 | 2.00E-04 | Fe-S protein assembly chaperone HscA                                             |
| <i>PluDJC_21905</i> | 1.4122  | 0.0036   | 5-methyltetrahydropteroyltriglutamate--homocysteine S-methyltransferase          |
| <i>PluDJC_16905</i> | 1.40851 | 0.0351   | hypothetical protein. plasmid stabilization protein                              |
| <i>PluDJC_13785</i> | 1.40537 | 5.00E-05 | phosphoenolpyruvate synthase                                                     |
| <i>PluDJC_04730</i> | 1.39957 | 0.0219   | helix-turn-helix transcriptional regulator                                       |
| <i>PluDJC_13425</i> | 1.39599 | 0.00015  | fatty acid metabolism transcriptional regulator FadR                             |
| <i>PluDJC_12095</i> | 1.39504 | 0.04055  | antitoxin                                                                        |
| <i>PluDJC_08625</i> | 1.3869  | 0.00055  | Rpn family recombination-promoting nuclease/putative transposase                 |
| <i>PluDJC_24405</i> | 1.37401 | 0.0012   | 3-deoxy-D-manno-octulosonic acid transferase                                     |
| <i>PluDJC_10415</i> | 1.37326 | 0.00475  | LuxR family transcriptional regulator                                            |
| <i>PluDJC_15625</i> | 1.37283 | 0.0149   | type II toxin-antitoxin system VapC family toxin. plasmid stability protein StbB |
| <i>PluDJC_07410</i> | 1.36905 | 0.001    | GTP 3'\.8-cyclase MoaA                                                           |
| <i>PluDJC_20380</i> | 1.36375 | 0.00195  | DUF29 domain-containing protein                                                  |
| <i>PluDJC_19735</i> | 1.35608 | 0.01355  | helix-turn-helix domain-containing protein. XRE family transcriptional regulator |
| <i>PluDJC_07405</i> | 1.34536 | 0.00675  | uridine diphosphate-N-acetylglucosamine-binding protein YvckK                    |
| <i>PluDJC_01395</i> | 1.33651 | 0.00035  | molecular chaperone                                                              |
| <i>PluDJC_10395</i> | 1.3361  | 0.0048   | membrane protein                                                                 |
| <i>PluDJC_20265</i> | 1.33303 | 0.0424   | ABC transporter ATP-binding protein                                              |
| <i>PluDJC_21195</i> | 1.32154 | 0.00245  | aldehyde dehydrogenase family protein                                            |

|                     |          |          |                                                                                       |
|---------------------|----------|----------|---------------------------------------------------------------------------------------|
| <i>PluDJC_12740</i> | 1.29411  | 0.0268   | glycosyltransferase family 2 protein                                                  |
| <i>PluDJC_17240</i> | 1.28963  | 0.00235  | type II toxin-antitoxin system HicB family antitoxin                                  |
| <i>PluDJC_17245</i> | 1.27696  | 0.04085  | type II toxin-antitoxin system HicA family toxin                                      |
| <i>PluDJC_16725</i> | 1.27329  | 0.0146   | ISC system 2Fe-2S type ferredoxin                                                     |
| <i>PluDJC_16415</i> | 1.26898  | 0.00115  | Rpn family recombination-promoting nuclease/putative transposase                      |
| <i>PluDJC_13975</i> | 1.26798  | 4.00E-04 | integration host factor subunit alpha                                                 |
| <i>PluDJC_19435</i> | 1.24997  | 0.036    | DUF1062 domain-containing protein                                                     |
| <i>PluDJC_01735</i> | 1.2353   | 0.0382   | hypothetical protein                                                                  |
| <i>PluDJC_14415</i> | 1.23365  | 0.00835  | AI-2E family transporter                                                              |
| <i>PluDJC_19730</i> | 1.23284  | 0.0116   | toxin RelE                                                                            |
| <i>PluDJC_11450</i> | 1.21704  | 0.02515  | 2-hydroxyacid dehydrogenase. D-lactate dehydrogenase                                  |
| <i>PluDJC_11395</i> | 1.2035   | 0.00085  | long-chain-fatty-acid--CoA ligase FadD                                                |
| <i>PluDJC_17480</i> | 1.20171  | 0.002    | propionate catabolism operon regulatory protein PrpR                                  |
| <i>PluDJC_23690</i> | 1.19478  | 0.0023   | met regulon transcriptional regulator MetJ                                            |
| <i>PluDJC_16265</i> | 1.19449  | 0.02545  | tripartite tricarboxylate transporter substrate binding protein                       |
| <i>PluDJC_22740</i> | 1.18887  | 0.00305  | LysR family transcriptional regulator                                                 |
| <i>PluDJC_16185</i> | 1.18467  | 0.00535  | colicin V production protein                                                          |
| <i>PluDJC_22525</i> | 1.16278  | 0.03965  | transcriptional regulator ArgR. arginine repressor                                    |
| <i>PluDJC_14475</i> | 1.16265  | 0.02605  | phosphoribosylformylglycinamide cyclo-ligase                                          |
| <i>PluDJC_05665</i> | 1.13742  | 0.01895  | LysR family transcriptional regulator                                                 |
| <i>PluDJC_12900</i> | 1.1341   | 0.00695  | hypothetical protein                                                                  |
| <i>PluDJC_19695</i> | 1.12832  | 0.00445  | tRNA (adenosine(37)-N6)-threonylcarbamoyltransferase complex transferase subunit TsaD |
| <i>PluDJC_19360</i> | 1.12401  | 0.00205  | Rpn family recombination-promoting nuclease/putative transposase                      |
| <i>PluDJC_11425</i> | 1.11948  | 0.00545  | fumarylacetoacetate hydrolase family protein                                          |
| <i>PluDJC_16910</i> | 1.11796  | 0.00235  | phosphoribosylformylglycinamide synthase                                              |
| <i>PluDJC_13095</i> | 1.10895  | 0.01135  | oligopeptide ABC transporter permease OppB                                            |
| <i>PluDJC_06975</i> | 1.08714  | 0.0117   | Nif3-like dinuclear metal center hexameric protein                                    |
| <i>PluDJC_21840</i> | 1.07155  | 0.0026   | porphobilinogen synthase                                                              |
| <i>PluDJC_06075</i> | 1.04972  | 0.005    | outer membrane protein assembly factor BamD                                           |
| <i>PluDJC_19500</i> | 1.02164  | 0.01975  | hypothetical protein                                                                  |
| <i>PluDJC_11435</i> | 1.01839  | 0.007    | hypothetical protein                                                                  |
| <i>PluDJC_10415</i> | 1.00322  | 0.0086   | helix-turn-helix transcriptional regulator. LuxR family transcriptional regulator     |
| <i>PluDJC_20195</i> | -6.75812 | 0.0127   | Bcr/CflA family efflux MFS transporter                                                |
| <i>PluDJC_02900</i> | -5.97221 | 5.00E-05 | molecular chaperone DnaJ                                                              |
| <i>PluDJC_18970</i> | -5.89903 | 5.00E-05 | molecular chaperone HtpG                                                              |
| <i>PluDJC_20460</i> | -5.87562 | 5.00E-05 | co-chaperone GroES                                                                    |
| <i>PluDJC_15900</i> | -5.76873 | 0.0338   | aspartate aminotransferase family protein                                             |
| <i>PluDJC_20195</i> | -5.63593 | 1.00E-04 | isocitrate/isopropylmalate dehydrogenase family protein                               |
| <i>PluDJC_02895</i> | -5.59007 | 5.00E-05 | molecular chaperone DnaK                                                              |
| <i>PluDJC_15400</i> | -5.50578 | 0.01655  | hypothetical protein                                                                  |
| <i>PluDJC_03235</i> | -5.47929 | 0.0127   | hypothetical protein                                                                  |

|                     |          |          |                                                              |
|---------------------|----------|----------|--------------------------------------------------------------|
| <i>PluDJC_23720</i> | -5.46407 | 5.00E-05 | HslU--HslV peptidase ATPase subunit                          |
| <i>PluDJC_23490</i> | -5.25005 | 5.00E-05 | 50S ribosomal protein L3                                     |
| <i>PluDJC_00990</i> | -5.24041 | 0.01015  | asparagine synthase                                          |
| <i>PluDJC_20885</i> | -5.20137 | 0.00905  | OmpA family protein                                          |
| <i>PluDJC_18730</i> | -5.1898  | 0.0127   | cold-shock protein                                           |
| <i>PluDJC_20795</i> | -5.15252 | 0.009    | Hcp family type VI secretion system effector                 |
| <i>PluDJC_23400</i> | -5.07539 | 0.0127   | 50S ribosomal protein L30                                    |
| <i>PluDJC_22830</i> | -5.05348 | 0.01655  | hypothetical protein                                         |
| <i>PluDJC_20455</i> | -5.04552 | 5.00E-05 | chaperonin GroEL                                             |
| <i>PluDJC_23460</i> | -5.03935 | 5.00E-05 | 50S ribosomal protein L22                                    |
| <i>PluDJC_15035</i> | -4.93148 | 0.01655  | 50S ribosomal protein L25                                    |
| <i>PluDJC_20620</i> | -4.92246 | 0.0127   | hypothetical protein                                         |
| <i>PluDJC_19475</i> | -4.87518 | 0.0127   | DUF29 domain-containing protein                              |
| <i>PluDJC_19620</i> | -4.76388 | 0.01655  | accessory factor UbiK family protein                         |
| <i>PluDJC_14110</i> | -4.73338 | 5.00E-05 | non-heme ferritin                                            |
| <i>PluDJC_05070</i> | -4.72299 | 5.00E-05 | 5-carboxymethyl-2-hydroxymuconate semialdehyde dehydrogenase |
| <i>PluDJC_22270</i> | -4.66768 | 5.00E-04 | anaerobic ribonucleoside-triphosphate reductase              |
| <i>PluDJC_03630</i> | -4.64818 | 0.0057   | sulfate adenylyltransferase subunit CysD                     |
| <i>PluDJC_05075</i> | -4.6352  | 0.0173   | 2-hydroxyhepta-2.4-diene-1.7-dioate isomerase                |
| <i>PluDJC_02595</i> | -4.56917 | 0.0011   | PLP-dependent transferase                                    |
| <i>PluDJC_06090</i> | -4.56117 | 5.00E-05 | ATP-dependent chaperone ClpB                                 |
| <i>PluDJC_14895</i> | -4.5512  | 0.0127   | NAD(P)-dependent oxidoreductase                              |
| <i>PluDJC_15080</i> | -4.54606 | 0.0127   | DUF4431 domain-containing protein                            |
| <i>PluDJC_23465</i> | -4.5234  | 5.00E-05 | 50S ribosomal protein L22                                    |
| <i>PluDJC_09075</i> | -4.51146 | 0.0034   | N-glycosyltransferase                                        |
| <i>PluDJC_23715</i> | -4.51042 | 0.0039   | ATP-dependent protease subunit HslV                          |
| <i>PluDJC_03240</i> | -4.48918 | 5.00E-05 | serine protease                                              |
| <i>PluDJC_13405</i> | -4.45225 | 5.00E-05 | glyceraldehyde-3-phosphate dehydrogenase                     |
| <i>PluDJC_23375</i> | -4.43112 | 5.00E-05 | 30S ribosomal protein S11                                    |
| <i>PluDJC_05065</i> | -4.42829 | 5.00E-05 | 3.4-dihydroxyphenylacetate 2.3-dioxygenase                   |
| <i>PluDJC_20190</i> | -4.40881 | 0.027    | RraA family protein                                          |
| <i>PluDJC_23510</i> | -4.40336 | 7.00E-04 | elongation factor Tu                                         |
| <i>PluDJC_23160</i> | -4.40151 | 7.00E-04 | ketol-acid reductoisomerase                                  |
| <i>PluDJC_18810</i> | -4.37768 | 0.0484   | peptidylprolyl isomerase B                                   |
| <i>PluDJC_23475</i> | -4.37201 | 5.00E-05 | 50S ribosomal protein L2                                     |
| <i>PluDJC_15890</i> | -4.33825 | 5.00E-05 | succinylglutamate-semialdehyde dehydrogenase                 |
| <i>PluDJC_22415</i> | -4.3382  | 0.0443   | 30S ribosome-binding factor RbfA                             |
| <i>PluDJC_20185</i> | -4.32084 | 0.02335  | hypothetical protein                                         |
| <i>PluDJC_22425</i> | -4.30021 | 5.00E-05 | transcription termination/antitermination protein NusA       |
| <i>PluDJC_20435</i> | -4.28931 | 0.03255  | elongation factor P                                          |
| <i>PluDJC_24455</i> | -4.27371 | 0.0483   | 50S ribosomal protein L28                                    |
| <i>PluDJC_14980</i> | -4.23319 | 0.00115  | 1-phosphofructokinase                                        |



|                     |          |          |                                                       |
|---------------------|----------|----------|-------------------------------------------------------|
| <i>PluDJC_06065</i> | -4.22895 | 0.0272   | bifunctional chorismate mutase/prephenate dehydratase |
| <i>PluDJC_17660</i> | -4.20563 | 5.00E-05 | aminomethyl-transferring glycine dehydrogenase        |
| <i>PluDJC_23395</i> | -4.19595 | 5.00E-05 | 50S ribosomal protein L15                             |
| <i>PluDJC_15895</i> | -4.17214 | 0.00035  | arginine N-succinyltransferase                        |
| <i>PluDJC_23440</i> | -4.14683 | 5.00E-05 | 50S ribosomal protein L14                             |
| <i>PluDJC_05925</i> | -4.08762 | 0.0127   | xanthine phosphoribosyltransferase                    |
| <i>PluDJC_03410</i> | -4.02548 | 5.00E-05 | elongation factor Ts                                  |
| <i>PluDJC_23420</i> | -4.01003 | 5.00E-05 | 30S ribosomal protein S8                              |
| <i>PluDJC_19135</i> | -4.00171 | 5.00E-05 | endopeptidase La                                      |
| <i>PluDJC_14155</i> | -3.96761 | 4.00E-04 | PTS mannose/fructose/sorbose transporter subunit IIC  |
| <i>PluDJC_10155</i> | -3.95257 | 5.00E-05 | flagellin FliC                                        |
| <i>PluDJC_23405</i> | -3.94488 | 5.00E-05 | 30S ribosomal protein S5                              |
| <i>PluDJC_14125</i> | -3.93415 | 0.00085  | Protein yebF precursor                                |
| <i>PluDJC_07585</i> | -3.898   | 0.00395  | ABC-F family ATPase                                   |
| <i>PluDJC_04775</i> | -3.89699 | 0.00715  | hypothetical protein                                  |
| <i>PluDJC_23370</i> | -3.88934 | 5.00E-05 | 30S ribosomal protein S4                              |
| <i>PluDJC_22835</i> | -3.88769 | 0.0065   | hypothetical protein                                  |
| <i>PluDJC_23380</i> | -3.87673 | 5.00E-05 | 30S ribosomal protein S13                             |
| <i>PluDJC_17670</i> | -3.87083 | 5.00E-05 | glycine cleavage system aminomethyltransferase GcvT   |
| <i>PluDJC_00210</i> | -3.8684  | 5.00E-05 | F0F1 ATP synthase subunit gamma                       |
| <i>PluDJC_10365</i> | -3.85439 | 5.00E-05 | PTS fructose transporter subunit IIBC                 |
| <i>PluDJC_20410</i> | -3.83925 | 0.0209   | fumarate reductase (quinol) flavoprotein subunit      |
| <i>PluDJC_05050</i> | -3.829   | 0.00205  | NAD-dependent succinate-semialdehyde dehydrogenase    |
| <i>PluDJC_19150</i> | -3.81257 | 5.00E-05 | trigger factor                                        |
| <i>PluDJC_05080</i> | -3.79826 | 0.02955  | hpaG1                                                 |
| <i>PluDJC_23430</i> | -3.7865  | 5.00E-05 | 50S ribosomal protein L5                              |
| <i>PluDJC_03405</i> | -3.78376 | 5.00E-05 | 30S ribosomal protein S2                              |
| <i>PluDJC_03505</i> | -3.74437 | 5.00E-05 | proline--tRNA ligase                                  |
| <i>PluDJC_17665</i> | -3.74065 | 0.00025  | glycine cleavage system protein GcvH                  |
| <i>PluDJC_22430</i> | -3.70907 | 0.00505  | ribosome maturation factor RimP                       |
| <i>PluDJC_23360</i> | -3.69971 | 5.00E-05 | 50S ribosomal protein L17                             |
| <i>PluDJC_15410</i> | -3.69637 | 0.00175  | glycosyltransferase family 2 protein                  |
| <i>PluDJC_22820</i> | -3.68195 | 0.0215   | type VI secretion system tip protein VgrG             |
| <i>PluDJC_04680</i> | -3.66691 | 0.00025  | hypothetical protein                                  |
| <i>PluDJC_00220</i> | -3.66295 | 5.00E-05 | F0F1 ATP synthase subunit delta                       |
| <i>PluDJC_14160</i> | -3.65908 | 1.00E-04 | PTS mannose transporter subunit IID                   |
| <i>PluDJC_23365</i> | -3.63227 | 5.00E-05 | DNA-directed RNA polymerase subunit alpha             |
| <i>PluDJC_07685</i> | -3.5685  | 5.00E-05 | NADP-dependent phosphogluconate dehydrogenase         |
| <i>PluDJC_23435</i> | -3.56649 | 5.00E-05 | 50S ribosomal protein L24                             |
| <i>PluDJC_23470</i> | -3.56254 | 0.00025  | 30S ribosomal protein S19                             |
| <i>PluDJC_01585</i> | -3.55806 | 5.00E-05 | ABC transporter substrate-binding protein             |
| <i>PluDJC_22420</i> | -3.54059 | 5.00E-05 | translation initiation factor IF-2                    |

|                     |          |          |                                                           |
|---------------------|----------|----------|-----------------------------------------------------------|
| <i>PluDJC_06980</i> | -3.52694 | 5.00E-05 | citrate synthase                                          |
| <i>PluDJC_22520</i> | -3.51176 | 5.00E-05 | malate dehydrogenase                                      |
| <i>PluDJC_02800</i> | -3.49904 | 5.00E-05 | bifunctional aspartate kinase/homoserine dehydrogenase I  |
| <i>PluDJC_23455</i> | -3.49402 | 5.00E-05 | 50S ribosomal protein L16                                 |
| <i>PluDJC_10360</i> | -3.48217 | 5.00E-05 | fused PTS fructose transporter subunit IIA/HPr protein    |
| <i>PluDJC_12500</i> | -3.47764 | 5.00E-05 | DUF945 domain-containing protein                          |
| <i>PluDJC_00225</i> | -3.47403 | 5.00E-05 | F0F1 ATP synthase subunit B                               |
| <i>PluDJC_14150</i> | -3.47368 | 5.00E-05 | PTS mannose transporter subunit IIAB                      |
| <i>PluDJC_23410</i> | -3.45524 | 4.00E-04 | 50S ribosomal protein L18                                 |
| <i>PluDJC_01000</i> | -3.44739 | 0.0107   | spore coat protein CotH                                   |
| <i>PluDJC_05045</i> | -3.43519 | 5.00E-05 | 2-oxo-hepta-3-ene-1,7-dioic acid hydratase                |
| <i>PluDJC_03195</i> | -3.42765 | 5.00E-05 | type I secretion system permease/ATPase                   |
| <i>PluDJC_22380</i> | -3.40744 | 5.00E-05 | DEAD/DEAH family ATP-dependent RNA helicase               |
| <i>PluDJC_24665</i> | -3.40342 | 0.00135  | membrane protein insertase YidC                           |
| <i>PluDJC_15885</i> | -3.3805  | 6.00E-04 | N-succinylarginine dihydrolase                            |
| <i>PluDJC_01185</i> | -3.36459 | 0.0188   | amino acid ABC transporter permease                       |
| <i>PluDJC_02135</i> | -3.34239 | 5.00E-05 | 50S ribosomal protein L1                                  |
| <i>PluDJC_21340</i> | -3.34119 | 0.0014   | DUF2170 family protein                                    |
| <i>PluDJC_23350</i> | -3.34103 | 0.0139   | alternative ribosome-rescue factor A                      |
| <i>PluDJC_09965</i> | -3.33637 | 0.0081   | flagellar hook protein FlgE                               |
| <i>PluDJC_04850</i> | -3.31278 | 0.0117   | LuxR family transcriptional regulator                     |
| <i>PluDJC_12820</i> | -3.30834 | 0.01905  | LapA family protein                                       |
| <i>PluDJC_05040</i> | -3.3004  | 0.00035  | 4-hydroxy-2-oxoheptanedioate aldolase                     |
| <i>PluDJC_00215</i> | -3.24946 | 5.00E-05 | F0F1 ATP synthase subunit alpha                           |
| <i>PluDJC_05605</i> | -3.2397  | 0.04805  | XTP/dITP diphosphatase                                    |
| <i>PluDJC_16645</i> | -3.22894 | 0.04875  | hypothetical protein                                      |
| <i>PluDJC_09035</i> | -3.20613 | 0.00015  | porin                                                     |
| <i>PluDJC_02810</i> | -3.20074 | 1.00E-04 | threonine synthase                                        |
| <i>PluDJC_04670</i> | -3.19587 | 5.00E-05 | phosphopyruvate hydratase                                 |
| <i>PluDJC_23415</i> | -3.18905 | 5.00E-05 | 50S ribosomal protein L6                                  |
| <i>PluDJC_07560</i> | -3.18581 | 0.0192   | alkylphosphonate utilization protein                      |
| <i>PluDJC_01815</i> | -3.16993 | 1.00E-04 | type VI secretion system contractile sheath large subunit |
| <i>PluDJC_00205</i> | -3.16294 | 5.00E-05 | F0F1 ATP synthase subunit beta                            |
| <i>PluDJC_12505</i> | -3.12825 | 0.00265  | adenosine deaminase                                       |
| <i>PluDJC_23770</i> | -3.12396 | 5.00E-05 | 6-phosphofructokinase                                     |
| <i>PluDJC_23390</i> | -3.11666 | 5.00E-05 | preprotein translocase subunit SecY                       |
| <i>PluDJC_21890</i> | -3.0847  | 0.01225  | uridine phosphorylase                                     |
| <i>PluDJC_18050</i> | -3.07707 | 0.0015   | 3-isopropylmalate dehydratase large subunit               |
| <i>PluDJC_22660</i> | -3.07559 | 1.00E-04 | primosomal replication protein N                          |
| <i>PluDJC_14625</i> | -3.06769 | 0.0117   | N-acetylmuramoyl-L-alanine amidase                        |
| <i>PluDJC_21810</i> | -3.04963 | 0.0448   | Xaa-Pro dipeptidase                                       |
| <i>PluDJC_23425</i> | -3.04647 | 5.00E-05 | 30S ribosomal protein S14                                 |

|                     |          |          |                                                      |
|---------------------|----------|----------|------------------------------------------------------|
| <i>PluDJC_22650</i> | -3.03198 | 5.00E-05 | 50S ribosomal protein L9                             |
| <i>PluDJC_22400</i> | -3.02897 | 5.00E-05 | polyribonucleotide nucleotidyltransferase            |
| <i>PluDJC_02805</i> | -3.02659 | 1.00E-04 | homoserine kinase                                    |
| <i>PluDJC_21585</i> | -3.02403 | 0.0107   | acetyltransferase                                    |
| <i>PluDJC_18965</i> | -3.02032 | 0.00135  | adenylate kinase                                     |
| <i>PluDJC_03500</i> | -3.01953 | 0.00305  | envelope stress response activation lipoprotein NlpE |
| <i>PluDJC_07780</i> | -2.99674 | 5.00E-05 | HAAAP family serine/threonine permease               |
| <i>PluDJC_05060</i> | -2.99649 | 0.01615  | 5-carboxymethyl-2-hydroxymuconate Delta-isomerase    |
| <i>PluDJC_07020</i> | -2.99549 | 5.00E-05 | succinate--CoA ligase subunit alpha                  |
| <i>PluDJC_02145</i> | -2.97868 | 5.00E-05 | 50S ribosomal protein L7/L12                         |
| <i>PluDJC_23445</i> | -2.96957 | 0.00175  | 30S ribosomal protein S17                            |
| <i>PluDJC_20635</i> | -2.95889 | 5.00E-05 | hypothetical protein                                 |
| <i>PluDJC_00700</i> | -2.95275 | 5.00E-05 | oligopeptidase A                                     |
| <i>PluDJC_15590</i> | -2.94675 | 5.00E-05 | DNA topoisomerase (ATP-hydrolyzing) subunit A        |
| <i>PluDJC_16640</i> | -2.92786 | 5.00E-05 | Hcp family type VI secretion system effector         |
| <i>PluDJC_02140</i> | -2.92019 | 5.00E-05 | 50S ribosomal protein L10                            |
| <i>PluDJC_16085</i> | -2.91525 | 0.0121   | 3-hydroxy-5-phosphonooxypentane-2,4-dione thiolase   |
| <i>PluDJC_22815</i> | -2.90286 | 5.00E-05 | type VI secretion system baseplate subunit TssF      |
| <i>PluDJC_11870</i> | -2.85078 | 0.00595  | DUF1283 family protein                               |
| <i>PluDJC_08355</i> | -2.8247  | 5.00E-05 | formate C-acetyltransferase                          |
| <i>PluDJC_06725</i> | -2.82382 | 0.01575  | YgiW/Ydel family stress tolerance OB fold protein    |
| <i>PluDJC_18005</i> | -2.81416 | 0.0063   | acetolactate synthase 3 large subunit                |
| <i>PluDJC_06035</i> | -2.78523 | 5.00E-05 | tRNA (guanosine(37)-N1)-methyltransferase TrmD       |
| <i>PluDJC_04665</i> | -2.78487 | 5.00E-05 | CTP synthase (glutamine hydrolyzing)                 |
| <i>PluDJC_02600</i> | -2.74841 | 5.00E-05 | pyridoxal-phosphate dependent enzyme                 |
| <i>PluDJC_02540</i> | -2.73765 | 5.00E-04 | hypothetical protein                                 |
| <i>PluDJC_00230</i> | -2.72186 | 0.00095  | F0F1 ATP synthase subunit C                          |
| <i>PluDJC_04455</i> | -2.71373 | 0.0155   | 3-methyl-2-oxobutanoate hydroxymethyltransferase     |
| <i>PluDJC_02130</i> | -2.7045  | 5.00E-05 | 50S ribosomal protein L11                            |
| <i>PluDJC_05700</i> | -2.7007  | 0.0035   | Na(+)-translocating NADH-quinone reductase subunit A |
| <i>PluDJC_01180</i> | -2.70032 | 0.0131   | amino acid ABC transporter permease                  |
| <i>PluDJC_16790</i> | -2.6995  | 5.00E-05 | serine hydroxymethyltransferase                      |
| <i>PluDJC_21330</i> | -2.69473 | 1.00E-04 | DUF2491 family protein                               |
| <i>PluDJC_03635</i> | -2.67841 | 1.00E-04 | sulfate adenylyltransferase subunit CysN             |
| <i>PluDJC_14390</i> | -2.62635 | 5.00E-05 | outer membrane protein assembly factor BamC          |
| <i>PluDJC_13420</i> | -2.61606 | 5.00E-05 | D-amino acid dehydrogenase                           |
| <i>PluDJC_21500</i> | -2.60064 | 0.00605  | MBL fold metallo-hydrolase                           |
| <i>PluDJC_01600</i> | -2.59507 | 0.0159   | dipeptide ABC transporter ATP-binding protein        |
| <i>PluDJC_11590</i> | -2.5853  | 0.0361   | urease subunit gamma                                 |
| <i>PluDJC_22665</i> | -2.58386 | 0.00075  | 30S ribosomal protein S6                             |
| <i>PluDJC_21670</i> | -2.55542 | 2.00E-04 | glucose-6-phosphate isomerase                        |
| <i>PluDJC_02940</i> | -2.55256 | 0.00155  | transcriptional activator NhaR                       |

|                     |          |          |                                                                                         |
|---------------------|----------|----------|-----------------------------------------------------------------------------------------|
| <i>PluDJC_19635</i> | -2.53173 | 5.00E-05 | membrane protein                                                                        |
| <i>PluDJC_01590</i> | -2.52541 | 5.00E-05 | dipeptide ABC transporter permease DppB                                                 |
| <i>PluDJC_04685</i> | -2.5212  | 5.00E-05 | cysteine desulfurase                                                                    |
| <i>PluDJC_01175</i> | -2.51885 | 5.00E-05 | transporter substrate-binding domain-containing protein                                 |
| <i>PluDJC_09930</i> | -2.51319 | 5.00E-05 | hypothetical protein                                                                    |
| <i>PluDJC_06040</i> | -2.50252 | 0.00025  | 50S ribosomal protein L19                                                               |
| <i>PluDJC_22410</i> | -2.49472 | 5.00E-05 | tRNA pseudouridine(55) synthase TruB                                                    |
| <i>PluDJC_00515</i> | -2.49396 | 5.00E-05 | phosphoenolpyruvate carboxykinase (ATP)                                                 |
| <i>PluDJC_02155</i> | -2.49393 | 5.00E-05 | DNA-directed RNA polymerase subunit beta'                                               |
| <i>PluDJC_12060</i> | -2.4783  | 0.0045   | PhzF family phenazine biosynthesis protein                                              |
| <i>PluDJC_00025</i> | -2.47395 | 0.01785  | Hcp family type VI secretion system effector                                            |
| <i>PluDJC_22065</i> | -2.47289 | 1.00E-04 | S8 family peptidase                                                                     |
| <i>PluDJC_07270</i> | -2.46512 | 5.00E-05 | 2.3-diphosphoglycerate-dependent phosphoglycerate mutase                                |
| <i>PluDJC_22060</i> | -2.45832 | 5.00E-05 | AAA family ATPase                                                                       |
| <i>PluDJC_21290</i> | -2.41888 | 0.0232   | LamB/YcsF family protein                                                                |
| <i>PluDJC_02320</i> | -2.41804 | 0.00305  | zinc-binding dehydrogenase                                                              |
| <i>PluDJC_09970</i> | -2.41371 | 0.00905  | flagellar basal body rod protein FlgF                                                   |
| <i>PluDJC_02115</i> | -2.41195 | 5.00E-05 | elongation factor Tu                                                                    |
| <i>PluDJC_07015</i> | -2.41088 | 5.00E-05 | ADP-forming succinate--CoA ligase subunit beta                                          |
| <i>PluDJC_14900</i> | -2.4104  | 0.0046   | DUF496 family protein                                                                   |
| <i>PluDJC_14630</i> | -2.40512 | 5.00E-05 | alanine:cation symporter family protein                                                 |
| <i>PluDJC_06790</i> | -2.40334 | 5.00E-05 | hypothetical protein                                                                    |
| <i>PluDJC_22485</i> | -2.40143 | 0.00015  | GTPase ObgE                                                                             |
| <i>PluDJC_17515</i> | -2.39825 | 5.00E-05 | lysine--tRNA ligase                                                                     |
| <i>PluDJC_09505</i> | -2.37938 | 0.0117   | MurR/RpiR family transcriptional regulator. iron-sulfur cluster assembly protein HesB   |
| <i>PluDJC_03445</i> | -2.37141 | 5.00E-05 | outer membrane protein assembly factor BamA                                             |
| <i>PluDJC_19700</i> | -2.36717 | 5.00E-05 | 30S ribosomal protein S21                                                               |
| <i>PluDJC_18960</i> | -2.35838 | 0.0144   | ferrochelatase                                                                          |
| <i>PluDJC_13040</i> | -2.34874 | 0.00035  | attachment protein                                                                      |
| <i>PluDJC_13025</i> | -2.33488 | 0.01145  | outer membrane protein OmpW                                                             |
| <i>PluDJC_01820</i> | -2.29714 | 0.0174   | type VI secretion system contractile sheath small subunit                               |
| <i>PluDJC_13610</i> | -2.28238 | 5.00E-05 | anhydro-N-acetylmuramic acid kinase                                                     |
| <i>PluDJC_02110</i> | -2.27966 | 5.00E-05 | elongation factor G                                                                     |
| <i>PluDJC_03785</i> | -2.26604 | 0.0368   | dihydrofolate reductase                                                                 |
| <i>PluDJC_14395</i> | -2.26105 | 0.00025  | 4-hydroxy-tetrahydrodipicolinate synthase                                               |
| <i>PluDJC_05000</i> | -2.26049 | 5.00E-05 | 4-hydroxyphenylacetate 3-monooxygenase. Pyoverdin chromophore biosynthetic protein pvcC |
| <i>PluDJC_02395</i> | -2.25982 | 5.00E-05 | uroporphyrinogen decarboxylase                                                          |
| <i>PluDJC_22540</i> | -2.25019 | 5.00E-05 | inorganic diphosphatase                                                                 |
| <i>PluDJC_21060</i> | -2.24603 | 0.0023   | 4-hydroxyphenylacetate 3-monooxygenase                                                  |
| <i>PluDJC_14100</i> | -2.24169 | 0.00165  | copper homeostasis membrane protein CopD                                                |
| <i>PluDJC_20365</i> | -2.23922 | 5.00E-05 | glycerol dehydrogenase                                                                  |
| <i>PluDJC_05715</i> | -2.23588 | 0.04415  | NADH:ubiquinone reductase (Na(+)-transporting) subunit D                                |

|                     |          |          |                                                                                                        |
|---------------------|----------|----------|--------------------------------------------------------------------------------------------------------|
| <i>PluDJC_03640</i> | -2.22971 | 0.03285  | adenylyl-sulfate kinase                                                                                |
| <i>PluDJC_17760</i> | -2.22447 | 0.03335  | UPF0231 family protein                                                                                 |
| <i>PluDJC_00025</i> | -2.22382 | 5.00E-05 | aspartate-semialdehyde dehydrogenase                                                                   |
| <i>PluDJC_04855</i> | -2.22364 | 5.00E-05 | transketolase                                                                                          |
| <i>PluDJC_04320</i> | -2.21559 | 0.0369   | hypoxanthine phosphoribosyltransferase                                                                 |
| <i>PluDJC_03450</i> | -2.21189 | 5.00E-05 | molecular chaperone Skp                                                                                |
| <i>PluDJC_05965</i> | -2.20463 | 5.00E-05 | recombinase RecA                                                                                       |
| <i>PluDJC_21555</i> | -2.20139 | 0.00025  | alanine racemase                                                                                       |
| <i>PluDJC_19125</i> | -2.20003 | 5.00E-05 | peptidylprolyl isomerase. chaperone                                                                    |
| <i>PluDJC_18470</i> | -2.19177 | 5.00E-05 | sodium:alanine symporter family protein                                                                |
| <i>PluDJC_02150</i> | -2.19033 | 5.00E-05 | DNA-directed RNA polymerase subunit beta. rpoB                                                         |
| <i>PluDJC_13115</i> | -2.19009 | 5.00E-05 | bifunctional acetaldehyde-CoA/alcohol dehydrogenase                                                    |
| <i>PluDJC_16345</i> | -2.18851 | 0.00185  | imidazolonepropionase                                                                                  |
| <i>PluDJC_09690</i> | -2.18289 | 0.01635  | flagellar transcriptional regulator FlhC. AraC family transcriptional regulator                        |
| <i>PluDJC_17755</i> | -2.18231 | 0.005    | small-conductance mechanosensitive channel MscS                                                        |
| <i>PluDJC_12555</i> | -2.18222 | 0.01005  | oxidoreductase                                                                                         |
| <i>PluDJC_01605</i> | -2.17215 | 0.0019   | ABC transporter ATP-binding protein                                                                    |
| <i>PluDJC_11470</i> | -2.16784 | 0.0141   | FMN-dependent NADH-azoreductase                                                                        |
| <i>PluDJC_01130</i> | -2.16347 | 5.00E-05 | RNA-binding transcriptional accessory protein                                                          |
| <i>PluDJC_06175</i> | -2.16231 | 3.00E-04 | proline/glycine betaine ABC transporter ATP-binding protein ProV                                       |
| <i>PluDJC_02840</i> | -2.15639 | 0.04315  | molybdopterin adenylyltransferase                                                                      |
| <i>PluDJC_23135</i> | -2.13294 | 5.00E-05 | transcription termination factor Rho                                                                   |
| <i>PluDJC_09030</i> | -2.13125 | 7.00E-04 | porin. outer membrane porin protein C                                                                  |
| <i>PluDJC_19175</i> | -2.11998 | 5.00E-05 | ion channel protein Tsx                                                                                |
| <i>PluDJC_04900</i> | -2.11783 | 5.00E-05 | erythrose-4-phosphate dehydrogenase                                                                    |
| <i>PluDJC_19040</i> | -2.11655 | 5.00E-05 | efflux RND transporter periplasmic adaptor subunit                                                     |
| <i>PluDJC_06815</i> | -2.10384 | 1.00E-04 | glutamate--tRNA ligase                                                                                 |
| <i>PluDJC_06770</i> | -2.10345 | 0.0421   | phosphocarrier protein Hpr                                                                             |
| <i>PluDJC_24225</i> | -2.09372 | 0.0061   | IS630 family transposase                                                                               |
| <i>PluDJC_02945</i> | -2.08527 | 0.0058   | 30S ribosomal protein S20                                                                              |
| <i>PluDJC_07060</i> | -2.08325 | 0.00065  | ATP-grasp domain-containing protein                                                                    |
| <i>PluDJC_02065</i> | -2.08284 | 5.00E-05 | peptidylprolyl isomerase                                                                               |
| <i>PluDJC_00235</i> | -2.0816  | 0.00025  | F0F1 ATP synthase subunit A                                                                            |
| <i>PluDJC_06380</i> | -2.07112 | 5.00E-05 | glutamine--tRNA ligase                                                                                 |
| <i>PluDJC_07630</i> | -2.05821 | 0.0057   | cytidine deaminase                                                                                     |
| <i>PluDJC_03625</i> | -2.04555 | 0.0022   | uroporphyrinogen-III C-methyltransferase                                                               |
| <i>PluDJC_12405</i> | -2.04434 | 5.00E-05 | decarboxylase                                                                                          |
| <i>PluDJC_13035</i> | -2.04276 | 0.02015  | attachment protein                                                                                     |
| <i>PluDJC_03415</i> | -2.03474 | 0.00755  | UMP kinase                                                                                             |
| <i>PluDJC_05035</i> | -2.03319 | 0.00045  | 4-hydroxyphenylacetate permease                                                                        |
| <i>PluDJC_23540</i> | -2.02595 | 0.0459   | bifunctional biotin-. bifunctional biotin--[acetyl-CoA-carboxylase] synthetase/biotin operon repressor |

|                     |          |          |                                                                         |
|---------------------|----------|----------|-------------------------------------------------------------------------|
| <i>PluDJC_07460</i> | -2.02269 | 0.00375  | secretion protein HlyD                                                  |
| <i>PluDJC_09975</i> | -2.01749 | 0.00475  | flagellar basal-body rod protein FlgG                                   |
| <i>PluDJC_07885</i> | -2.01739 | 5.00E-05 | leucine-responsive transcriptional regulator Lrp                        |
| <i>PluDJC_22455</i> | -2.00954 | 0.02365  | dihydropteroate synthase                                                |
| <i>PluDJC_14385</i> | -1.9954  | 5.00E-05 | phosphoribosylaminoimidazolesuccinocarboxamide synthase                 |
| <i>PluDJC_13980</i> | -1.99125 | 5.00E-05 | phenylalanine--tRNA ligase subunit beta                                 |
| <i>PluDJC_15790</i> | -1.98091 | 5.00E-04 | NADH-quinone oxidoreductase subunit B                                   |
| <i>PluDJC_07610</i> | -1.97439 | 0.0372   | GTP cyclohydrolase I FoIE                                               |
| <i>PluDJC_07655</i> | -1.97013 | 5.00E-05 | methionine--tRNA ligase                                                 |
| <i>PluDJC_00190</i> | -1.9657  | 5.00E-05 | glutamine--fructose-6-phosphate transaminase (isomerizing)              |
| <i>PluDJC_21335</i> | -1.96152 | 5.00E-05 | PspA/IM30 family protein                                                |
| <i>PluDJC_02585</i> | -1.94774 | 5.00E-05 | phosphopentomutase                                                      |
| <i>PluDJC_17185</i> | -1.94748 | 5.00E-05 | nucleotide exchange factor GrpE                                         |
| <i>PluDJC_20170</i> | -1.94651 | 5.00E-05 | acetyl-CoA carboxylase biotin carboxylase subunit                       |
| <i>PluDJC_01270</i> | -1.9434  | 7.00E-04 | glutamate--ammonia ligase                                               |
| <i>PluDJC_05085</i> | -1.93293 | 0.01385  | homoprotocatechuate degradation operon regulator HpaR                   |
| <i>PluDJC_15545</i> | -1.92022 | 0.0255   | branched-chain amino acid transaminase                                  |
| <i>PluDJC_17045</i> | -1.91791 | 0.00015  | elongation factor 4                                                     |
| <i>PluDJC_22450</i> | -1.91638 | 2.00E-04 | phosphoglucosamine mutase                                               |
| <i>PluDJC_05425</i> | -1.91607 | 0.0128   | putative addiction module antidote protein                              |
| <i>PluDJC_09455</i> | -1.91506 | 4.00E-04 | type I-F CRISPR-associated protein Csy3. CRISPR-associated protein Cas5 |
| <i>PluDJC_16340</i> | -1.90758 | 0.0045   | formimidoylglutamase                                                    |
| <i>PluDJC_03455</i> | -1.90729 | 5.00E-05 | UDP-3-O-(3-hydroxymyristoyl)glucosamine N-acyltransferase               |
| <i>PluDJC_19310</i> | -1.90442 | 5.00E-05 | protein translocase subunit SecD                                        |
| <i>PluDJC_23225</i> | -1.90105 | 5.00E-04 | threonine ammonia-lyase. biosynthetic                                   |
| <i>PluDJC_02955</i> | -1.89762 | 5.00E-05 | isoleucine--tRNA ligase                                                 |
| <i>PluDJC_04515</i> | -1.88872 | 3.00E-04 | similar to killer protein pyocin s3 hypothetical protein                |
| <i>PluDJC_03020</i> | -1.88426 | 5.00E-05 | hypothetical protein                                                    |
| <i>PluDJC_06730</i> | -1.87588 | 0.02915  | RpoE-regulated lipoprotein                                              |
| <i>PluDJC_06025</i> | -1.87082 | 0.0129   | 30S ribosomal protein S16                                               |
| <i>PluDJC_00200</i> | -1.86972 | 0.00015  | F0F1 ATP synthase subunit epsilon                                       |
| <i>PluDJC_00195</i> | -1.85512 | 0.00015  | bifunctional UDP-N-acetylglucosamine diphosphorylase                    |
| <i>PluDJC_21245</i> | -1.8451  | 0.02295  | type II toxin-antitoxin system antitoxin CcdA. pirin                    |
| <i>PluDJC_01450</i> | -1.83564 | 0.02495  | DNA-directed RNA polymerase subunit omega. rpoZ                         |
| <i>PluDJC_15540</i> | -1.83056 | 0.0016   | phenylacetate--CoA ligase family protein                                |
| <i>PluDJC_00690</i> | -1.81119 | 5.00E-05 | NADP-specific glutamate dehydrogenase                                   |
| <i>PluDJC_15740</i> | -1.80172 | 0.00065  | NADH-quinone oxidoreductase subunit M                                   |
| <i>PluDJC_02075</i> | -1.79299 | 5.00E-05 | FKBP-type peptidyl-prolyl cis-trans isomerase                           |
| <i>PluDJC_06030</i> | -1.79014 | 5.00E-05 | ribosome maturation factor RimM                                         |
| <i>PluDJC_21550</i> | -1.78714 | 1.00E-04 | aspartate/tyrosine/aromatic aminotransferase                            |
| <i>PluDJC_02105</i> | -1.78284 | 5.00E-05 | 30S ribosomal protein S7                                                |
| <i>PluDJC_17785</i> | -1.77294 | 5.00E-05 | dihydrolipoyl dehydrogenase                                             |

|                     |          |          |                                                                                     |
|---------------------|----------|----------|-------------------------------------------------------------------------------------|
| <i>PluDJC_07100</i> | -1.77234 | 5.00E-05 | cytochrome bd-I ubiquinol oxidase subunit CydA                                      |
| <i>PluDJC_22460</i> | -1.77129 | 5.00E-05 | ATP-dependent zinc metalloprotease FtsH                                             |
| <i>PluDJC_06700</i> | -1.76373 | 5.00E-05 | ribosome biogenesis GTPase Der                                                      |
| <i>PluDJC_04435</i> | -1.74831 | 0.0034   | ABC transporter ATP-binding protein                                                 |
| <i>PluDJC_19185</i> | -1.74013 | 1.00E-04 | cytochrome o ubiquinol oxidase subunit I                                            |
| <i>PluDJC_04905</i> | -1.73751 | 5.00E-05 | phosphoglycerate kinase                                                             |
| <i>PluDJC_05770</i> | -1.73579 | 0.00035  | NADH:ubiquinone reductase (Na <sup>+</sup> )-transporting) subunit F                |
| <i>PluDJC_15600</i> | -1.73274 | 5.00E-05 | ribonucleoside-diphosphate reductase subunit alpha                                  |
| <i>PluDJC_14085</i> | -1.73172 | 0.00315  | GAF domain-containing protein                                                       |
| <i>PluDJC_07475</i> | -1.70536 | 0.00265  | ATP-dependent RNA helicase RhlE                                                     |
| <i>PluDJC_01595</i> | -1.69647 | 0.00065  | dipeptide ABC transporter permease DppC                                             |
| <i>PluDJC_09665</i> | -1.68886 | 0.00015  | transcription antiterminator/RNA stability regulator CspE. cold-shock protein       |
| <i>PluDJC_08385</i> | -1.68799 | 5.00E-05 | 3-phosphoserine/phosphohydroxythreonine transaminase                                |
| <i>PluDJC_19655</i> | -1.67724 | 0.00185  | bifunctional D-glycero-beta-D-manno-heptose-7-phosphate kinase                      |
| <i>PluDJC_08365</i> | -1.67445 | 0.00015  | 30S ribosomal protein S12 methylthiotransferase accessory factor YcaO               |
| <i>PluDJC_22185</i> | -1.66975 | 5.00E-05 | valine--tRNA ligase                                                                 |
| <i>PluDJC_11035</i> | -1.66524 | 4.00E-04 | ribose-phosphate pyrophosphokinase                                                  |
| <i>PluDJC_16055</i> | -1.65552 | 4.00E-04 | autoinducer-2 kinase                                                                |
| <i>PluDJC_06690</i> | -1.65304 | 0.00025  | tetratricopeptide repeat protein                                                    |
| <i>PluDJC_20470</i> | -1.64978 | 5.00E-05 | aspartate ammonia-lyase                                                             |
| <i>PluDJC_20465</i> | -1.64196 | 0.02475  | FxsA family protein                                                                 |
| <i>PluDJC_14680</i> | -1.63983 | 5.00E-05 | NADP-dependent isocitrate dehydrogenase                                             |
| <i>PluDJC_22445</i> | -1.63361 | 3.00E-04 | preprotein translocase subunit SecE                                                 |
| <i>PluDJC_06685</i> | -1.63022 | 5.00E-05 | histidine--tRNA ligase                                                              |
| <i>PluDJC_09550</i> | -1.62979 | 3.00E-04 | sulfurtransferase                                                                   |
| <i>PluDJC_14105</i> | -1.61236 | 0.00185  | CopC domain-containing protein YobA                                                 |
| <i>PluDJC_24495</i> | -1.60239 | 0.0032   | YicC family protein                                                                 |
| <i>PluDJC_20165</i> | -1.60056 | 0.00325  | acetyl-CoA carboxylase biotin carboxyl carrier protein                              |
| <i>PluDJC_02240</i> | -1.59238 | 0.0013   | maltose/maltodextrin ABC transporter substrate-binding protein MalE                 |
| <i>PluDJC_01875</i> | -1.58493 | 6.00E-04 | histidinol-phosphatase                                                              |
| <i>PluDJC_19950</i> | -1.58131 | 0.00025  | UDP-N-acetylglucosamine 1-carboxyvinyltransferase                                   |
| <i>PluDJC_23605</i> | -1.58115 | 0.0047   | Si-specific NAD(P)(+) transhydrogenase soluble pyridine nucleotide transhydrogenase |
| <i>PluDJC_04100</i> | -1.5766  | 0.0064   | threo-3-hydroxy-L-aspartate ammonia-lyase                                           |
| <i>PluDJC_15775</i> | -1.56986 | 8.00E-04 | NADH-quinone oxidoreductase subunit NuoF                                            |
| <i>PluDJC_24435</i> | -1.56836 | 0.04195  | glycosyltransferase family 1 protein                                                |
| <i>PluDJC_14005</i> | -1.56123 | 2.00E-04 | threonine--tRNA ligase                                                              |
| <i>PluDJC_03390</i> | -1.55381 | 0.0034   | 2.3.4.5-tetrahydropyridine-2.6-dicarboxylate N-succinyltransferase                  |
| <i>PluDJC_04690</i> | -1.55329 | 5.00E-04 | MFS transporter                                                                     |
| <i>PluDJC_11570</i> | -1.55221 | 0.00025  | Re/Si-specific NAD(P)(+) transhydrogenase subunit beta                              |
| <i>PluDJC_08490</i> | -1.54967 | 2.00E-04 | chromosome partition protein MukB                                                   |

|                     |          |          |                                                                                               |
|---------------------|----------|----------|-----------------------------------------------------------------------------------------------|
| <i>PluDJC_22695</i> | -1.54525 | 5.00E-05 | FtsH protease activity modulator HflK                                                         |
| <i>PluDJC_16880</i> | -1.5421  | 5.00E-05 | NAD+ synthase                                                                                 |
| <i>PluDJC_02090</i> | -1.54198 | 0.008    | sulfurtransferase complex subunit TusC                                                        |
| <i>PluDJC_02100</i> | -1.53206 | 0.00135  | 30S ribosomal protein S12                                                                     |
| <i>PluDJC_11050</i> | -1.52388 | 0.0041   | glutamyl-tRNA reductase. hemA                                                                 |
| <i>PluDJC_22465</i> | -1.5224  | 2.00E-04 | 23S rRNA (uridine(2552)-2'-O)-methyltransferase RlmE                                          |
| <i>PluDJC_01070</i> | -1.52026 | 0.0075   | cluster biogenesis protein NfuA                                                               |
| <i>PluDJC_13705</i> | -1.51988 | 5.00E-05 | major outer membrane lipoprotein                                                              |
| <i>PluDJC_24370</i> | -1.51166 | 0.00635  | ADP-glyceromanno-heptose 6-epimerase                                                          |
| <i>PluDJC_01545</i> | -1.51148 | 0.00285  | glycine--tRNA ligase subunit alpha                                                            |
| <i>PluDJC_23235</i> | -1.51042 | 0.00095  | branched-chain amino acid transaminase                                                        |
| <i>PluDJC_19130</i> | -1.50037 | 4.00E-04 | DNA-binding protein HU-beta                                                                   |
| <i>PluDJC_17995</i> | -1.48714 | 0.00095  | catabolite repressor/activator                                                                |
| <i>PluDJC_06080</i> | -1.4744  | 0.00195  | 23S rRNA pseudouridine(1911/1915/1917) synthase RluD                                          |
| <i>PluDJC_16320</i> | -1.47412 | 8.00E-04 | histidine ammonia-lyase                                                                       |
| <i>PluDJC_04515</i> | -1.47319 | 0.0014   | hypothetical protein                                                                          |
| <i>PluDJC_03055</i> | -1.4626  | 0.03105  | peptidylprolyl isomerase SurA                                                                 |
| <i>PluDJC_19580</i> | -1.45783 | 0.00015  | outer membrane channel protein TolC                                                           |
| <i>PluDJC_16325</i> | -1.45737 | 0.00795  | urocanate hydratase                                                                           |
| <i>PluDJC_19290</i> | -1.43939 | 0.0169   | 6.7-dimethyl-8-ribityllumazine synthase                                                       |
| <i>PluDJC_07905</i> | -1.4309  | 1.00E-04 | serine--tRNA ligase                                                                           |
| <i>PluDJC_14080</i> | -1.42201 | 0.0011   | RNA chaperone ProQ                                                                            |
| <i>PluDJC_22800</i> | -1.41572 | 0.00535  | phosphatidylserine decarboxylase                                                              |
| <i>PluDJC_12400</i> | -1.41284 | 0.00905  | tyrosine transporter TyrP                                                                     |
| <i>PluDJC_15075</i> | -1.4087  | 0.00765  | hypothetical protein                                                                          |
| <i>PluDJC_02870</i> | -1.40337 | 0.00695  | UDP-glucose--hexose-1-phosphate uridylyltransferase                                           |
| <i>PluDJC_07895</i> | -1.40043 | 0.00445  | outer membrane lipoprotein chaperone LolA                                                     |
| <i>PluDJC_01885</i> | -1.39553 | 1.00E-04 | DNA polymerase I                                                                              |
| <i>PluDJC_14815</i> | -1.39015 | 0.00845  | metal-dependent hydrolase                                                                     |
| <i>PluDJC_23005</i> | -1.38284 | 0.0022   | diaminopimelate epimerase                                                                     |
| <i>PluDJC_11530</i> | -1.3785  | 0.0017   | alpha/beta hydrolase                                                                          |
| <i>PluDJC_17520</i> | -1.37555 | 0.0025   | peptide chain release factor 2                                                                |
| <i>PluDJC_19540</i> | -1.37545 | 0.01595  | 2.5-didehydrogluconate reductase DkgA                                                         |
| <i>PluDJC_24365</i> | -1.36845 | 4.00E-04 | glycine C-acetyltransferase                                                                   |
| <i>PluDJC_01275</i> | -1.36589 | 0.0017   | ribosome-dependent GTPase TypA                                                                |
| <i>PluDJC_19885</i> | -1.36537 | 0.00235  | stringent starvation protein A                                                                |
| <i>PluDJC_19895</i> | -1.35979 | 0.0035   | 50S ribosomal protein L13                                                                     |
| <i>PluDJC_23230</i> | -1.35898 | 0.00095  | dihydroxy-acid dehydratase                                                                    |
| <i>PluDJC_06765</i> | -1.3513  | 1.00E-04 | phosphoenolpyruvate-protein phosphotransferase PtsI                                           |
| <i>PluDJC_14120</i> | -1.34918 | 0.0022   | prolyl aminopeptidase                                                                         |
| <i>PluDJC_02590</i> | -1.34907 | 0.00365  | purine-nucleoside phosphorylase. DeoD                                                         |
| <i>PluDJC_11380</i> | -1.34889 | 0.0088   | tRNA (adenosine(37)-N6)-threonylcarbamoyltransferase complex dimerization subunit type 1 TsaB |



|                     |          |          |                                                                                      |
|---------------------|----------|----------|--------------------------------------------------------------------------------------|
| <i>PluDJC_17390</i> | -1.3425  | 0.01975  | hypothetical protein                                                                 |
| <i>PluDJC_05685</i> | -1.33905 | 0.0063   | D-sedoheptulose 7-phosphate isomerase. gmhA                                          |
| <i>PluDJC_21005</i> | -1.33591 | 0.0062   | peptide chain release factor 3                                                       |
| <i>PluDJC_07010</i> | -1.33196 | 3.00E-04 | 2-oxoglutarate dehydrogenase complex dihydrolipoyllysine-residue succinyltransferase |
| <i>PluDJC_21215</i> | -1.33185 | 0.01165  | nucleoside hydrolase                                                                 |
| <i>PluDJC_13415</i> | -1.33146 | 0.00175  | alanine racemase                                                                     |
| <i>PluDJC_11155</i> | -1.32724 | 0.00655  | molecular chaperone                                                                  |
| <i>PluDJC_04475</i> | -1.32127 | 0.00345  | RNA polymerase-binding protein DksA                                                  |
| <i>PluDJC_00020</i> | -1.32037 | 1.00E-04 | DNA topoisomerase (ATP-hydrolyzing) subunit B                                        |
| <i>PluDJC_17900</i> | -1.31993 | 0.00065  | preprotein translocase subunit SecA                                                  |
| <i>PluDJC_14730</i> | -1.31955 | 0.0043   | peptidase T                                                                          |
| <i>PluDJC_19670</i> | -1.30385 | 0.0324   | SH3 domain-containing protein                                                        |
| <i>PluDJC_07145</i> | -1.30035 | 7.00E-04 | peptidoglycan-associated lipoprotein Pal                                             |
| <i>PluDJC_07140</i> | -1.29562 | 0.00095  | Tol-Pal system protein TolB                                                          |
| <i>PluDJC_20150</i> | -1.29392 | 0.0012   | rod shape-determining protein                                                        |
| <i>PluDJC_21320</i> | -1.29349 | 0.00435  | DUF1190 domain-containing protein                                                    |
| <i>PluDJC_19045</i> | -1.28778 | 4.00E-04 | multidrug efflux RND transporter permease subunit                                    |
| <i>PluDJC_22585</i> | -1.28618 | 0.0036   | peptidyl-prolyl cis-trans isomerase                                                  |
| <i>PluDJC_11565</i> | -1.2833  | 0.002    | Re/Si-specific NAD(P)(+) transhydrogenase subunit alpha                              |
| <i>PluDJC_19315</i> | -1.27983 | 0.0398   | preprotein translocase subunit YajC                                                  |
| <i>PluDJC_14065</i> | -1.27463 | 0.01055  | L-cystine transporter                                                                |
| <i>PluDJC_13595</i> | -1.27279 | 0.00945  | pyridoxal kinase PdxY                                                                |
| <i>PluDJC_10045</i> | -1.27148 | 0.0349   | hypothetical protein                                                                 |
| <i>PluDJC_22580</i> | -1.25208 | 0.0081   | 3'-(2')-5'-bisphosphate nucleotidase CysQ                                            |
| <i>PluDJC_14265</i> | -1.23321 | 7.00E-04 | NADP-dependent oxaloacetate-decarboxylating malate dehydrogenase                     |
| <i>PluDJC_02455</i> | -1.231   | 0.0173   | HTH-type transcriptional regulator GntR                                              |
| <i>PluDJC_10850</i> | -1.226   | 0.00535  | universal stress protein                                                             |
| <i>PluDJC_21565</i> | -1.22567 | 0.00535  | quinone oxidoreductase                                                               |
| <i>PluDJC_15735</i> | -1.22506 | 0.0046   | NADH-quinone oxidoreductase subunit NuoN                                             |
| <i>PluDJC_15745</i> | -1.22358 | 0.00825  | NADH-quinone oxidoreductase subunit L                                                |
| <i>PluDJC_20040</i> | -1.22302 | 0.00855  | nucleoside diphosphate kinase regulator                                              |
| <i>PluDJC_07880</i> | -1.21716 | 0.00255  | thioredoxin-disulfide reductase                                                      |
| <i>PluDJC_02410</i> | -1.21046 | 0.00205  | DNA-binding protein HU-alpha                                                         |
| <i>PluDJC_14810</i> | -1.20792 | 0.02345  | purine nucleoside phosphoramidase                                                    |
| <i>PluDJC_23765</i> | -1.20742 | 0.0054   | triose-phosphate isomerase                                                           |
| <i>PluDJC_21325</i> | -1.20519 | 0.02765  | DUF350 domain-containing protein                                                     |
| <i>PluDJC_16310</i> | -1.19537 | 0.00795  | 50S ribosomal protein L3 N(5)-glutamine methyltransferase                            |
| <i>PluDJC_18860</i> | -1.19305 | 0.011    | Luciferase                                                                           |
| <i>PluDJC_04320</i> | -1.19029 | 0.0165   | multicopper oxidase CueO                                                             |
| <i>PluDJC_01615</i> | -1.18696 | 0.014    | insulinase family protein                                                            |
| <i>PluDJC_19320</i> | -1.18407 | 0.0093   | tRNA guanosine(34) transglycosylase Tgt                                              |
| <i>PluDJC_22475</i> | -1.18031 | 0.00235  | transcription elongation factor GreA                                                 |

|                     |          |         |                                                                                         |
|---------------------|----------|---------|-----------------------------------------------------------------------------------------|
| <i>PluDJC_07265</i> | -1.17839 | 0.0013  | 3-deoxy-7-phosphoheptulonate synthase                                                   |
| <i>PluDJC_07855</i> | -1.17606 | 0.0021  | ATP-dependent Clp protease ATP-binding subunit ClpA                                     |
| <i>PluDJC_06775</i> | -1.17523 | 0.00155 | cysteine synthase A                                                                     |
| <i>PluDJC_04660</i> | -1.17208 | 0.01    | nucleoside triphosphate pyrophosphohydrolase                                            |
| <i>PluDJC_00695</i> | -1.16217 | 0.0275  | 16S rRNA (guanine(1516)-N(2))-methyltransferase RsmJ                                    |
| <i>PluDJC_23320</i> | -1.16051 | 0.027   | hypothetical protein                                                                    |
| <i>PluDJC_01550</i> | -1.14224 | 0.0049  | glycine--tRNA ligase subunit beta                                                       |
| <i>PluDJC_21560</i> | -1.13805 | 0.00595 | replicative DNA helicase DnaB                                                           |
| <i>PluDJC_03385</i> | -1.13471 | 0.0046  | DUF3461 family protein                                                                  |
| <i>PluDJC_14075</i> | -1.13449 | 0.00265 | carboxy terminal-processing peptidase                                                   |
| <i>PluDJC_04665</i> | -1.13399 | 0.0029  | RES domain-containing protein                                                           |
| <i>PluDJC_19145</i> | -1.13265 | 0.0034  | ATP-dependent Clp protease proteolytic subunit                                          |
| <i>PluDJC_03430</i> | -1.12539 | 0.03775 | (2E.6E)-farnesyl-diphosphate-specific ditrans.polycis-undecaprenyl-diphosphate synthase |
| <i>PluDJC_19300</i> | -1.12535 | 0.03595 | transcriptional regulator NrdR                                                          |
| <i>PluDJC_06750</i> | -1.12185 | 0.0083  | sulfate/thiosulfate ABC transporter ATP-binding protein CysA                            |
| <i>PluDJC_02970</i> | -1.11681 | 0.018   | 4-hydroxy-3-methylbut-2-enyl diphosphate reductase                                      |
| <i>PluDJC_05940</i> | -1.11331 | 0.00675 | glutamate-5-semialdehyde dehydrogenase                                                  |
| <i>PluDJC_17180</i> | -1.10669 | 0.0339  | uracil-DNA glycosylase                                                                  |
| <i>PluDJC_22690</i> | -1.10395 | 0.00295 | protease modulator HflC                                                                 |
| <i>PluDJC_13600</i> | -1.10187 | 0.0034  | tyrosine--tRNA ligase                                                                   |
| <i>PluDJC_21830</i> | -1.10187 | 0.01215 | 4-hydroxy-3-polyprenylbenzoate decarboxylase                                            |
| <i>PluDJC_14885</i> | -1.10071 | 0.01535 | 23S rRNA pseudouridine(955/2504/2580) synthase RluC                                     |
| <i>PluDJC_19235</i> | -1.09653 | 0.0452  | (2E.6E)-farnesyl diphosphate synthase. geranyltranstransferase                          |
| <i>PluDJC_17920</i> | -1.09396 | 0.00465 | cell division protein FtsZ                                                              |
| <i>PluDJC_02795</i> | -1.09312 | 0.0019  | two-component system response regulator ArcA                                            |
| <i>PluDJC_04995</i> | -1.08617 | 0.0409  | 4-hydroxyphenylacetate 3-monooxygenase. reductase component                             |
| <i>PluDJC_19210</i> | -1.08434 | 0.01135 | YajQ family cyclic di-GMP-binding protein                                               |
| <i>PluDJC_03400</i> | -1.08179 | 0.02315 | type I methionyl aminopeptidase                                                         |
| <i>PluDJC_21240</i> | -1.0801  | 0.04215 | transcriptional regulator                                                               |
| <i>PluDJC_15870</i> | -1.07616 | 0.00855 | hypothetical protein                                                                    |
| <i>PluDJC_09040</i> | -1.07518 | 0.0066  | asparagine--tRNA ligase                                                                 |
| <i>PluDJC_13375</i> | -1.07391 | 0.03725 | NAD(P)H nitroreductase                                                                  |
| <i>PluDJC_17780</i> | -1.07129 | 0.0081  | bifunctional aconitate hydratase 2/2-methylisocitrate dehydratase                       |
| <i>PluDJC_01475</i> | -1.06353 | 0.00425 | hypothetical protein                                                                    |
| <i>PluDJC_09445</i> | -1.06073 | 0.02225 | type I-F CRISPR-associated protein Csy1                                                 |
| <i>PluDJC_15785</i> | -1.05225 | 0.00205 | NADH-quinone oxidoreductase subunit C/D                                                 |
| <i>PluDJC_02760</i> | -1.04836 | 0.00235 | energy-dependent translational throttle protein EttA                                    |
| <i>PluDJC_07545</i> | -1.04661 | 0.0369  | dihydrodipicolinate synthase family protein                                             |
| <i>PluDJC_09090</i> | -1.04657 | 0.00635 | ABC transporter ATP-binding protein. heme transporter                                   |
| <i>PluDJC_09015</i> | -1.04391 | 0.0083  | MBL fold metallo-hydrolase                                                              |
| <i>PluDJC_15865</i> | -1.04243 | 0.0106  | cysteine desulfurase                                                                    |

|                     |           |         |                                                                            |
|---------------------|-----------|---------|----------------------------------------------------------------------------|
| <i>PluDJC_03440</i> | -1.02667  | 0.0121  | sigma E protease regulator RseP                                            |
| <i>PluDJC_16885</i> | -1.02294  | 0.03025 | two-component system response regulator GlrR                               |
| <i>PluDJC_14585</i> | -1.02046  | 0.0417  | bifunctional hydroxymethylpyrimidine kinase/phosphomethylpyrimidine kinase |
| <i>PluDJC_01405</i> | -1.01899  | 0.0083  | type 1 fimbrial protein                                                    |
| <i>PluDJC_21315</i> | -1.01865  | 0.01655 | glutathionylspermidine synthase family protein                             |
| <i>PluDJC_23620</i> | -1.01661  | 0.0196  | argininosuccinate synthase                                                 |
| <i>PluDJC_07105</i> | -1.01609  | 0.0057  | cytochrome d ubiquinol oxidase subunit II                                  |
| <i>PluDJC_12490</i> | -1.00471  | 0.0069  | class II fumarate hydratase                                                |
| <i>PluDJC_19910</i> | -1.00216  | 0.0459  | DUF1043 family protein                                                     |
| <i>PluDJC_04615</i> | -0.983999 | 0.01815 | glutamate-1-semialdehyde 2.1-aminomutase                                   |
| <i>PluDJC_16810</i> | -0.976948 | 0.0142  | recombinase family protein                                                 |
| <i>PluDJC_00010</i> | -0.973209 | 0.0151  | DNA polymerase III subunit beta                                            |
| <i>PluDJC_16220</i> | -0.967192 | 0.02785 | 4-phosphoerythronate dehydrogenase PdxB                                    |
| <i>PluDJC_11560</i> | -0.960898 | 0.0282  | DUF1471 domain-containing protein                                          |
| <i>PluDJC_04910</i> | -0.955236 | 0.0092  | class II fructose-bisphosphate aldolase                                    |
| <i>PluDJC_18930</i> | -0.954552 | 0.0169  | bifunctional UDP-sugar hydrolase/5'-nucleotidase                           |
| <i>PluDJC_19890</i> | -0.951499 | 0.02685 | 30S ribosomal protein S9                                                   |
| <i>PluDJC_02095</i> | -0.945779 | 0.04495 | sulfurtransferase complex subunit TusB                                     |
| <i>PluDJC_07150</i> | -0.945015 | 0.0399  | cell division protein CpoB                                                 |
| <i>PluDJC_21645</i> | -0.943788 | 0.01595 | repressor LexA                                                             |
| <i>PluDJC_23335</i> | -0.937009 | 0.01425 | methionyl-tRNA formyltransferase                                           |
| <i>PluDJC_19555</i> | -0.891898 | 0.026   | DNA topoisomerase IV subunit A                                             |
| <i>PluDJC_00385</i> | -0.876923 | 0.0282  | acetate--CoA ligase                                                        |
| <i>PluDJC_04465</i> | -0.875604 | 0.0275  | polynucleotide adenylyltransferase PcnB                                    |
| <i>PluDJC_04310</i> | -0.873257 | 0.03825 | polyamine aminopropyltransferase                                           |
| <i>PluDJC_11410</i> | -0.841721 | 0.0315  | septum site-determining protein MinD                                       |
| <i>PluDJC_12845</i> | -0.837123 | 0.01315 | type I DNA topoisomerase                                                   |
| <i>PluDJC_06995</i> | -0.834874 | 0.033   | succinate dehydrogenase flavoprotein subunit                               |
| <i>PluDJC_13640</i> | -0.832057 | 0.0422  | Grx4 family monothiol glutaredoxin                                         |
| <i>PluDJC_03485</i> | -0.829846 | 0.0361  | acetyl-CoA carboxylase carboxyl transferase subunit alpha                  |
| <i>PluDJC_22390</i> | -0.821941 | 0.02615 | lipoprotein Nlpl                                                           |
| <i>PluDJC_06695</i> | -0.820083 | 0.02445 | outer membrane protein assembly factor BamB                                |
| <i>PluDJC_10270</i> | -0.817147 | 0.04315 | phospholipase D                                                            |
| <i>PluDJC_17040</i> | -0.816615 | 0.0348  | signal peptidase I                                                         |
| <i>PluDJC_01415</i> | -0.803801 | 0.02055 | molecular chaperone. pilus protein assembly                                |
| <i>PluDJC_15860</i> | -0.795186 | 0.03495 | class I SAM-dependent methyltransferase                                    |
| <i>PluDJC_11275</i> | -0.791935 | 0.047   | Holliday junction branch migration protein RuvA                            |
| <i>PluDJC_06305</i> | -0.785998 | 0.04015 | magnesium/cobalt transporter CorC                                          |
| <i>PluDJC_02835</i> | -0.777254 | 0.03235 | transaldolase                                                              |
| <i>PluDJC_18885</i> | -0.738176 | 0.04805 | co-chaperone YbbN                                                          |
| <i>PluDJC_17710</i> | -0.712913 | 0.0452  | phosphoglycerate dehydrogenase                                             |

**Table S2:** HPLC analysis of pea root exudates

| H <sub>2</sub> O portion |        |          |                                                         |
|--------------------------|--------|----------|---------------------------------------------------------|
| Number                   | R time | Area     | Name                                                    |
| 1                        | 5.246  | 3.49E+08 | O-Ethylhydroxylamine, 2TMS derivative                   |
| 2                        | 9.792  | 2.58E+06 | Phosphoric acid, 2 TMS monometil                        |
| 3                        | 9.951  | 2.02E+06 | Oxalic acid, 2TMS derivative                            |
| 4                        | 10.29  | 4.41E+05 | Propanedioic acid, 2TMS derivative                      |
| 5                        | 11.18  | 1.52E+06 | L-Serine, 2TMS derivative                               |
| 6                        | 11.29  | 1.20E+06 | Ethanolamine, 3TMS derivative                           |
| 7                        | 11.4   | 9.70E+06 | Silanol, trimethyl-, phosphate (3:1)                    |
| 8                        | 11.46  | 1.51E+07 | Glycerol, 3TMS derivative                               |
| 9                        | 11.76  | 2.09E+06 | L-Threonine, 2TMS derivative                            |
| 10                       | 11.91  | 6.61E+05 | Glycine. 3TMS derivative                                |
| 11                       | 12.73  | 6.45E+07 | L-Homoserine, 2TMS derivative                           |
| 12                       | 13.47  | 3.11E+06 | Butanoic acid, 2,4-bis[(trimethylsilyl)oxy]-, TMS ester |
| 13                       | 13.99  | 2.13E+07 | Homoserine, 3TMS derivative                             |
| 14                       | 14.48  | 1.38E+07 | Malic acid, 3TMS derivative                             |
| 15                       | 14.54  | 2.01E+06 | (({3,4-Bis[(trimethylsilyl)oxy]phenyl)methyl            |
| 16                       | 14.94  | 1.90E+06 | L-Asparagine                                            |
| 17                       | 15     | 1.63E+06 | 4-Aminobutanoic acid, 3TMS derivative                   |
| 18                       | 15.07  | 1.80E+06 | Pyroglutamic acid, TMS derivative                       |
| 19                       | 15.27  | 1.59E+06 | DL-Phenylalanine, TMS derivative                        |
| 20                       | 15.38  | 6.82E+08 | Trihydroxybutyric acid, 4TMS                            |
| 21                       | 16.29  | 1.34E+06 | L-(+)- Tartaric acid, 4TMS derivative                   |
| 22                       | 17.08  | 1.07E+06 | D-(+)-Xylose, 4TMS ether                                |
| 23                       | 17.23  | 4.53E+05 | Arabinitol, 5TMS derivative                             |
| 24                       | 18.32  | 1.94E+06 | Methyl galactoside, 4TMS derivative                     |
| 25                       | 18.9   | 1.03E+06 | Ribonic acid, 2,3,4,5-tetrakis-O-(TMS) -, TMS ester     |
| 26                       | 19.12  | 1.89E+07 | Methyl galactoside (15,2R,3S,4R,5R)-, 4TM               |
| 27                       | 19.27  | 7.55E+06 | D-Psicose, pentakis(trimethylsilyl) ether               |

|                          |        |          |                                                          |
|--------------------------|--------|----------|----------------------------------------------------------|
| 28                       | 19.5   | 2.64E+06 | Ethyl alpha-D-glucopyranoside, 4TMS                      |
| 29                       | 19.59  | 2.29E+07 | D-Allose, 5TMS ether                                     |
| 30                       | 19.68  | 1.11E+06 | D-Pinitol, 5TMS ether                                    |
| 31                       | 19.85  | 6.54E+06 | D-(+)-Talose, 5TMS ether                                 |
| 32                       | 19.94  | 4.97E+06 | Glucopyranose, 5TMS derivative                           |
| 33                       | 20.61  | 8.60E+05 | Palmitic Acid, TMS derivative                            |
| 34                       | 21     | 7.81E+06 | Myo-Inositol, 6TMS derivative                            |
| 35                       | 21.78  | 7.18E+05 | Phytol, TMS derivative                                   |
| 36                       | 21.84  | 5.35E+05 | D-Glucose, STMS derivative                               |
| 37                       | 24.57  | 6.34E+05 | D-(+)- Turanose, 8TMS ether                              |
| 38                       | 24.67  | 1.04E+06 | D-(+)-Turanose, 8TMS ether                               |
| 39                       | 25.56  | 1.09E+07 | Sucrose, 8 TMS derivative                                |
| 40                       | 25.63  | 4.71E+05 | D-(+)-Turanose, 8TMS ether                               |
|                          |        |          |                                                          |
| <b>MetOH<br/>portion</b> |        |          |                                                          |
| 1                        | 4.575  | 3.55E+07 | Hydroxy acetonitrile                                     |
| 2                        | 4.767  | 6.49E+06 | -                                                        |
| 3                        | 4.835  | 1.89E+07 | -                                                        |
| 4                        | 5.237  | 3.42E+08 | O-Ethylhydroxylamine, 2TMS derivative                    |
| 5                        | 5.492  | 1.51E+05 | Boric acid, 3TMS derivative                              |
| 6                        | 5.572  | 2.67E+05 | Tetramethylsilane                                        |
| 7                        | 7.381  | 3.12E+05 | Lactic acid, 2TMS derivative                             |
| 8                        | 8.302  | 1.82E+05 | 6-Ethyl-2-methyloctane                                   |
| 9                        | 10.452 | 1.56E+05 | Diethyl 2-aminomalonate                                  |
| 10                       | 11.448 | 4.80E+05 | Glycerol, 3TMS derivative                                |
| 11                       | 18.814 | 7.29E+05 | 1,2-Benzenedicarboxylic acid, bis (2-methlypropyl) ester |
| 12                       | 20.194 | 1.36E+05 | 3,8-Dimethylundecane                                     |
| 13                       | 20.608 | 5.78E+05 | Palmitic acid, TMS derivative                            |
| 14                       | 22.390 | 4.39E+05 | Stearic acid, TMS derivative                             |
| 15                       | 24.559 | 1.21E+05 | 3,8-Dimethylundecane                                     |
| 16                       | 24.822 | 1.27E+06 | Di- <i>n</i> -octyl phtalate                             |

|    |        |          |                                 |
|----|--------|----------|---------------------------------|
| 17 | 25.715 | 2.14E+05 | 2,6,10,14-Tetramethylhexadecane |
| 18 | 26.083 | 1.77E+5  | 7-Methylhexadecane              |
| 19 | 26.800 | 1.25E+05 | 1-Iodoeicosane                  |
| 20 | 26.910 | 4.09E+05 | Squalene                        |

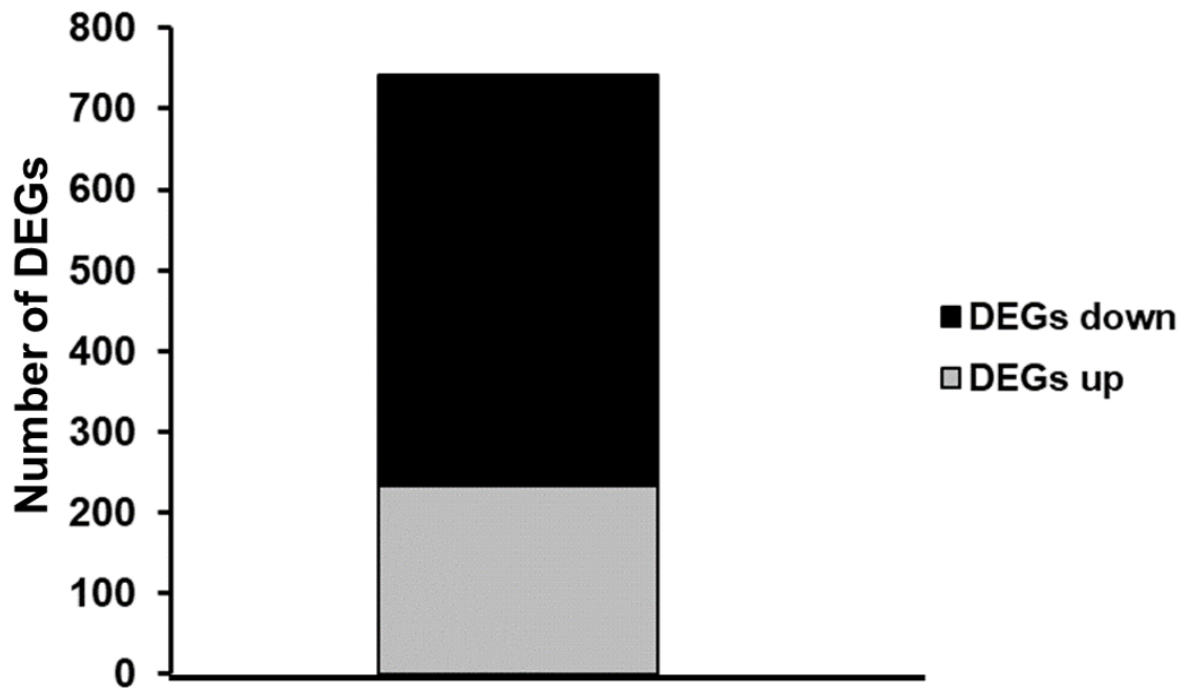

**Figure S1: Number of differential expressed genes (DEGs).** DEGs between *P. luminescens* 2° cultivated in LB with 3% root exudates from *Pisum sativum* var *Arvica* and its control (*P. luminescens* 2° in LB) resulting from the RNAseq analysis. 233 DEGs were upregulated (light grey) whereas 508 showed downregulation (black).

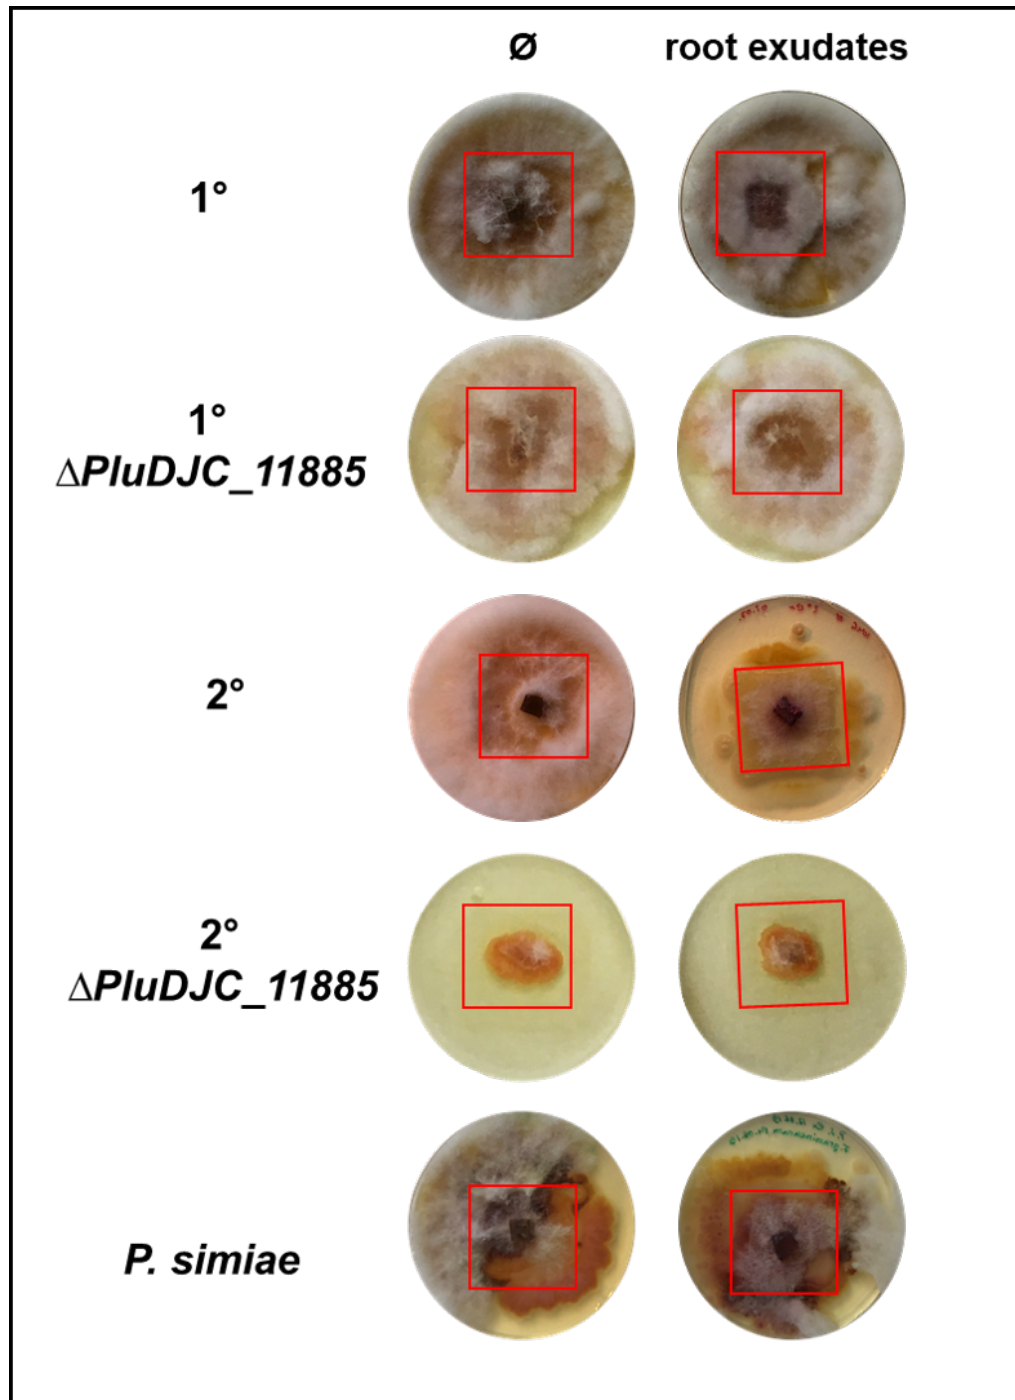

**Figure S2: Plant root exudates induced fungal growth inhibition activity in *P. luminescens* 2°.** Fungal growth inhibition assay with plant pathogenic *Fusarium graminearum* HM6PIS performed on YMG agar plates. *P. luminescens* 1°, *P. luminescens* 2°, wild type and their respective *chitinase* knockout mutants, and *P. simiae* WCS417; cultivated O/N in LB with and without plant root exudates, were placed around HM6PIS (red square) and incubated for 14d at 26°C. *P. luminescens* 2° cultivated in LB with plant root exudates inhibited the growth of *F. graminearum*, activity visible also for *P. simiae*. *P. luminescens* 2° chitinase knockout mutant showed a stronger growth inhibition capacity compared to its wild type. *P. luminescens* 1° and its knockout mutant do not show fungal growth inhibition. Three biological replicates were considered for each experiment.
